# Supplementary material for: Theoretical study of the optical and charge transport properties of π-conjugated three-coordinate organoboron compounds as organic light-emitting diodes materials
Source: Royal Society of Chemistry journal article supplement (doi:10.1039/c6ra24301k), 2016-01-01
Supplement: c6ra24301k1.pdf [file c6ra24301k1.pdf]

*RSC Advances*

## Theoretical study of the optical and charge transport properties of $\pi$ -conjugated three-coordinate organoboron compounds as organic light-emitting materials

Ruifa Jin\*

*Inner Mongolia Key Laboratory of Photoelectric Functional Materials and College of Chemistry and Chemical Engineering, Chifeng University, Chifeng 024000, China*

### Index

**Table S1** The Cartesian coordinates of **1–8** in  $S_0$  at the PBE0/6-31G(d,p) level.

**Table S2** The Cartesian coordinates of **1–8** in  $S_1$  at the TD-PBE0/6-31G(d,p) level.

**Table S3** The fluorescence ( $\lambda_{fl}$ ) wavelengths (in nm), the oscillator strength  $f$ , main assignments (coefficient), and main electronic transitions of **5** at the TD-PBE0/6-31+G(d,p)//TD-PBE0/6-31(d,p) level and discussion.

**Table S4** The calculated total energies of the compounds under investigation in different space groups.

**Table S5** The calculated crystal cell parameters of the compounds under investigation with the lowest total energies.

**Table S6** Center-center distance and the corresponding hole and electron coupling between the dimer in all of the nearest neighbor pathways for **1–6** in different space groups.

**Table SI** The Cartesian coordinates of **1–8** in S0 at the PBE0/6-31G(d,p) level.

| <b>1</b> |             |             |             |
|----------|-------------|-------------|-------------|
| C        | 0.00000000  | 0.00000000  | 0.00000000  |
| C        | 1.38317621  | 0.00000000  | 0.00000000  |
| C        | 2.10604367  | 1.20821264  | 0.00000000  |
| C        | 1.36770207  | 2.40511339  | -0.00819872 |
| C        | -0.01734554 | 2.39738353  | -0.02872453 |
| C        | -0.74988229 | 1.19503580  | -0.02061636 |
| H        | -0.53069406 | -0.94895029 | 0.01154022  |
| H        | 1.91229200  | -0.94851414 | 0.00519783  |
| H        | 1.90346627  | 3.35177640  | -0.00346130 |
| H        | -0.55665046 | 3.34127964  | -0.04786133 |
| C        | 5.87230464  | 0.29879130  | 0.00442424  |
| C        | 6.60770198  | -0.89582414 | -0.01127617 |
| C        | 6.61560627  | 1.49075737  | 0.02851879  |
| C        | 7.99156989  | -0.91642819 | -0.00852824 |
| H        | 6.07196612  | -1.84247015 | -0.02288251 |
| C        | 7.99711824  | 1.49213839  | 0.03088698  |
| H        | 6.10236420  | 2.44784051  | 0.04960617  |
| C        | 8.73033160  | 0.28427850  | 0.00314251  |
| H        | 8.49958727  | -1.87351425 | -0.01496309 |
| H        | 8.51516192  | 2.44367923  | 0.05617615  |
| N        | 10.10557444 | 0.28293755  | -0.01589228 |
| C        | 10.81970212 | -0.96594055 | 0.08966205  |
| H        | 11.89161516 | -0.77263196 | 0.03276427  |
| H        | 10.61695995 | -1.49095026 | 1.03516244  |
| H        | 10.56237303 | -1.64247272 | -0.73454291 |
| C        | 10.82625218 | 1.52363460  | 0.13490293  |
| H        | 11.89721497 | 1.32551281  | 0.07667007  |
| H        | 10.57783929 | 2.22944714  | -0.66718918 |
| H        | 10.62265132 | 2.01743441  | 1.09677201  |
| B        | -2.31274664 | 1.18649586  | -0.03376988 |
| C        | -3.07865349 | -0.13590787 | 0.38022443  |
| C        | -3.94486489 | -0.77682486 | -0.54333681 |
| C        | -2.90419840 | -0.73830561 | 1.64582227  |
| C        | -4.57706195 | -1.96835762 | -0.20167631 |
| C        | -3.56993321 | -1.92860939 | 1.95758505  |
| C        | -4.40595821 | -2.56485894 | 1.04920859  |
| H        | -5.22479659 | -2.44796192 | -0.93375933 |
| H        | -3.42650510 | -2.36542955 | 2.94483444  |
| C        | -3.08260083 | 2.50070668  | -0.46614071 |
| C        | -3.97601887 | 3.13608697  | 0.43533584  |
| C        | -2.88696127 | 3.09945876  | -1.72996776 |
| C        | -4.61689428 | 4.31662753  | 0.07372262  |
| C        | -3.56161742 | 4.27935261  | -2.06258259 |
| C        | -4.42741361 | 4.90786379  | -1.17746849 |
| H        | -5.28519845 | 4.79188617  | 0.79009592  |
| H        | -3.40159559 | 4.71394798  | -3.04833331 |
| C        | -2.07841460 | -0.11142393 | 2.74137457  |
| H        | -2.72944296 | 0.34356101  | 3.49806292  |
| H        | -1.47108756 | -0.86467698 | 3.25362895  |
| H        | -1.40623939 | 0.66502508  | 2.37356196  |
| C        | -4.17980830 | -0.21683724 | -1.92222823 |
| H        | -4.87311309 | -0.84789387 | -2.48498986 |
| H        | -4.59652277 | 0.79389604  | -1.87982244 |
| H        | -3.24985090 | -0.15672071 | -2.49850750 |
| C        | -5.09607533 | -3.85607057 | 1.38714193  |
| H        | -6.16428557 | -3.81063719 | 1.15046127  |
| H        | -4.67587767 | -4.69139023 | 0.81481081  |
| H        | -4.99524185 | -4.09772389 | 2.44863132  |
| C        | -2.02406322 | 2.48392387  | -2.80325215 |
| H        | -1.39467310 | 1.67527000  | -2.42981863 |
| H        | -2.64825975 | 2.07762441  | -3.60845661 |
| H        | -1.36757928 | 3.23451327  | -3.25582251 |
| C        | -4.22454631 | 2.58351708  | 1.81452326  |
| H        | -4.59185369 | 1.55385390  | 1.77521377  |

|   |             |             |             |
|---|-------------|-------------|-------------|
| H | -3.30812234 | 2.57514522  | 2.41543544  |
| H | -4.96107494 | 3.18886184  | 2.34991449  |
| C | -5.13987925 | 6.17914184  | -1.54357733 |
| H | -6.22717476 | 6.05465089  | -1.49062319 |
| H | -4.87718759 | 6.99346571  | -0.85906290 |
| H | -4.88827637 | 6.50001096  | -2.55789070 |
| C | 3.56030152  | 1.28264934  | 0.00837326  |
| C | 4.41995840  | 0.24317718  | -0.00113898 |
| H | 3.96040316  | 2.29543727  | 0.02112627  |
| H | 4.01178788  | -0.76686434 | -0.01741381 |

2

|   |             |             |             |
|---|-------------|-------------|-------------|
| C | 0.00000000  | 0.00000000  | 0.00000000  |
| C | 1.38660571  | 0.00000000  | 0.00000000  |
| C | 2.10627157  | 1.20459534  | 0.00000000  |
| C | 1.38003656  | 2.40521139  | -0.01004292 |
| C | -0.00644822 | 2.39747344  | -0.02887748 |
| C | -0.74114423 | 1.19669050  | -0.01939378 |
| H | -0.53329255 | -0.94713103 | 0.02196587  |
| H | 1.92602109  | -0.94259272 | 0.03494782  |
| H | 1.91465015  | 3.35079081  | -0.03752540 |
| H | -0.54468958 | 3.34160638  | -0.05812439 |
| C | 7.89701460  | 1.21398645  | 0.04815206  |
| C | 8.63099968  | 0.02158374  | 0.05948391  |
| C | 8.63143092  | 2.40613737  | 0.05757950  |
| C | 10.01630120 | 0.01091398  | 0.07687967  |
| H | 8.10384012  | -0.92832245 | 0.09044653  |
| C | 10.01676358 | 2.41613730  | 0.07195031  |
| H | 8.10543734  | 3.35671465  | 0.02756526  |
| C | 10.75207906 | 1.21334813  | 0.07231609  |
| H | 10.52768077 | -0.94394975 | 0.10902896  |
| H | 10.52933674 | 3.37098838  | 0.07116987  |
| N | 12.13154794 | 1.21390769  | 0.06281323  |
| C | 12.84146512 | -0.02943490 | 0.23818942  |
| H | 13.91420054 | 0.15792300  | 0.17159095  |
| H | 12.63637642 | -0.50759339 | 1.20865545  |
| H | 12.58477315 | -0.74481653 | -0.55184869 |
| C | 12.83944968 | 2.45393418  | 0.26916007  |
| H | 13.91309947 | 2.26359127  | 0.23522281  |
| H | 12.61012285 | 3.17802823  | -0.52179363 |
| H | 12.60505675 | 2.92341450  | 1.23692289  |
| B | -2.30792917 | 1.19205510  | -0.02970569 |
| C | -3.07168152 | -0.11941768 | 0.41740659  |
| C | -3.94421495 | -0.77900924 | -0.48715598 |
| C | -2.88705383 | -0.69584529 | 1.69347507  |
| C | -4.57281438 | -1.96362653 | -0.11679489 |
| C | -3.54980087 | -1.87980258 | 2.03409748  |
| C | -4.39233507 | -2.53437986 | 1.14498983  |
| H | -5.22473306 | -2.45889464 | -0.83453340 |
| H | -3.39875867 | -2.29661910 | 3.02877647  |
| C | -3.07429127 | 2.49847118  | -0.48698822 |
| C | -3.96462239 | 3.15144323  | 0.40504103  |
| C | -2.87549381 | 3.07674581  | -1.76011250 |
| C | -4.59643079 | 4.33155538  | 0.02596428  |
| C | -3.54183486 | 4.25602878  | -2.10989482 |
| C | -4.40193733 | 4.90407918  | -1.23296855 |
| H | -5.26212608 | 4.82179037  | 0.73447460  |
| H | -3.37943904 | 4.67433421  | -3.10215485 |
| C | -2.05394278 | -0.04627021 | 2.76994616  |
| H | -2.70036897 | 0.41093770  | 3.52912436  |
| H | -1.43171683 | -0.78617935 | 3.28380125  |
| H | -1.39484452 | 0.73243484  | 2.38381054  |
| C | -4.18541017 | -0.24887496 | -1.87666092 |
| H | -4.89394574 | -0.88248402 | -2.41708497 |
| H | -4.58550959 | 0.76906834  | -1.85530773 |
| H | -3.26036518 | -0.21809959 | -2.46323488 |
| C | -5.08338438 | -3.81598288 | 1.51556937  |

|   |             |             |             |
|---|-------------|-------------|-------------|
| H | -6.16300712 | -3.75022596 | 1.34313529  |
| H | -4.71316010 | -4.65413581 | 0.91405381  |
| H | -4.92493030 | -4.06616500 | 2.56794275  |
| C | -2.02265081 | 2.43366566  | -2.82496294 |
| H | -1.36331048 | 1.65966290  | -2.42994999 |
| H | -2.65509805 | 1.97204018  | -3.59318456 |
| H | -1.39883735 | 3.17834010  | -3.32992490 |
| C | -4.22192348 | 2.61930554  | 1.79087529  |
| H | -4.61409641 | 1.59842502  | 1.76373500  |
| H | -3.30526080 | 2.59536393  | 2.39075215  |
| H | -4.94288359 | 3.24758013  | 2.32099592  |
| C | -5.09772321 | 6.18017584  | -1.61353448 |
| H | -6.18052986 | 6.10150702  | -1.46834234 |
| H | -4.75199650 | 7.01888521  | -0.99843548 |
| H | -4.91620226 | 6.43792943  | -2.66032629 |
| C | 3.58189613  | 1.20826805  | 0.01089283  |
| C | 4.31535271  | 0.22734449  | -0.66990315 |
| C | 4.30042780  | 2.19222927  | 0.70316183  |
| C | 5.70224102  | 0.23257958  | -0.66162600 |
| H | 3.78920820  | -0.52659045 | -1.24877345 |
| C | 5.68728083  | 2.19191849  | 0.71810245  |
| H | 3.76200203  | 2.94421554  | 1.27320990  |
| C | 6.42302336  | 1.21328023  | 0.03467652  |
| H | 6.24078590  | -0.51640085 | -1.23538062 |
| H | 6.21321185  | 2.94281298  | 1.30097693  |

### 3

|   |             |             |             |
|---|-------------|-------------|-------------|
| C | 0.00000000  | 0.00000000  | 0.00000000  |
| C | 1.38423193  | 0.00000000  | 0.00000000  |
| C | 2.10376855  | 1.20837623  | 0.00000000  |
| C | 1.37324840  | 2.40806282  | -0.03467437 |
| C | -0.01158710 | 2.39583922  | -0.07045348 |
| C | -0.74572242 | 1.19483974  | -0.03966999 |
| H | -0.53054113 | -0.94873597 | 0.01774567  |
| H | 1.92223710  | -0.94317285 | -0.01259588 |
| H | 1.90172053  | 3.35785915  | -0.01738089 |
| H | -0.55021187 | 3.33942575  | -0.10650269 |
| C | 7.27749438  | 2.49394780  | -0.23737566 |
| C | 8.45627510  | 1.77279594  | -0.47499811 |
| C | 7.39065022  | 3.88900943  | -0.16644377 |
| C | 9.67963036  | 2.40151392  | -0.62592135 |
| H | 8.41093366  | 0.69088272  | -0.56136532 |
| C | 8.60530499  | 4.53390431  | -0.32336864 |
| H | 6.50738693  | 4.48723339  | 0.04276180  |
| C | 9.78930063  | 3.80682279  | -0.56438769 |
| H | 10.55666978 | 1.79141728  | -0.80718172 |
| H | 8.63235186  | 5.61414868  | -0.24363176 |
| N | 10.99923335 | 4.44087768  | -0.73944693 |
| C | 12.20925266 | 3.65844432  | -0.80935595 |
| H | 13.05938873 | 4.32569726  | -0.95713864 |
| H | 12.38984328 | 3.07140859  | 0.10393381  |
| H | 12.18535753 | 2.96456774  | -1.65830280 |
| C | 11.09601158 | 5.86290039  | -0.51628161 |
| H | 12.11562667 | 6.18986554  | -0.72443805 |
| H | 10.42996617 | 6.41606398  | -1.18925459 |
| H | 10.84888677 | 6.14961096  | 0.51726607  |
| B | -2.31109616 | 1.18951171  | -0.03753001 |
| C | -3.06593144 | -0.11334991 | 0.44827868  |
| C | -3.95617528 | -0.79325106 | -0.42285092 |
| C | -2.85126075 | -0.66367145 | 1.73174977  |
| C | -4.56914653 | -1.97456617 | -0.01655819 |
| C | -3.49786609 | -1.84540928 | 2.10856525  |
| C | -4.35459348 | -2.52212271 | 1.25004147  |
| H | -5.23587523 | -2.48539163 | -0.70946139 |
| H | -3.32379286 | -2.24228801 | 3.10770729  |
| C | -3.07901791 | 2.48788914  | -0.51336360 |
| C | -3.95469287 | 3.16524555  | 0.37447521  |

|   |             |             |             |
|---|-------------|-------------|-------------|
| C | -2.88743410 | 3.03957545  | -1.79955327 |
| C | -4.57768164 | 4.34511037  | -0.02007396 |
| C | -3.54436134 | 4.21942282  | -2.16450643 |
| C | -4.38950458 | 4.89192572  | -1.29123255 |
| H | -5.23013632 | 4.85632424  | 0.68594323  |
| H | -3.38646603 | 4.61944266  | -3.16501135 |
| C | -2.00305215 | 0.01210303  | 2.77988676  |
| H | -2.63890641 | 0.46056568  | 3.55301956  |
| H | -1.35063506 | -0.70982909 | 3.28190791  |
| H | -1.37193798 | 0.80199129  | 2.37090837  |
| C | -4.23739037 | -0.28741591 | -1.81404809 |
| H | -4.94975517 | -0.93922416 | -2.32702662 |
| H | -4.65198143 | 0.72495996  | -1.79784207 |
| H | -3.32751080 | -0.25228980 | -2.42367170 |
| C | -5.02209571 | -3.80554340 | 1.65613555  |
| H | -6.09566959 | -3.78176315 | 1.44174403  |
| H | -4.60447519 | -4.65871351 | 1.10880937  |
| H | -4.89459294 | -4.00216516 | 2.72389537  |
| C | -2.05001795 | 2.36761425  | -2.85843451 |
| H | -1.40012783 | 1.59049445  | -2.45382268 |
| H | -2.69343295 | 1.90269680  | -3.61546880 |
| H | -1.41801991 | 3.09443742  | -3.37900516 |
| C | -4.20341051 | 2.66102423  | 1.77233203  |
| H | -4.57915041 | 1.63373781  | 1.76765570  |
| H | -3.28626175 | 2.66492119  | 2.37229390  |
| H | -4.93389063 | 3.29003989  | 2.28821803  |
| C | -5.09084553 | 6.15795886  | -1.69500304 |
| H | -6.17415583 | 6.00572795  | -1.76430910 |
| H | -4.92567546 | 6.95554147  | -0.96285143 |
| H | -4.74248261 | 6.51536841  | -2.66762194 |
| C | 3.56045546  | 1.20041794  | 0.04231679  |
| C | 4.40166020  | 0.18343316  | 0.43439153  |
| S | 4.49627571  | 2.59152468  | -0.42313509 |
| C | 5.77097016  | 0.52339461  | 0.37904833  |
| H | 4.03858285  | -0.77234092 | 0.79510509  |
| C | 6.00313359  | 1.80822248  | -0.05973705 |
| H | 6.56766556  | -0.14135943 | 0.69312491  |

4

|   |             |             |             |
|---|-------------|-------------|-------------|
| C | 0.00000000  | 0.00000000  | 0.00000000  |
| C | 1.38305512  | 0.00000000  | 0.00000000  |
| C | 2.09738878  | 1.21095541  | 0.00000000  |
| C | 1.37253878  | 2.41450128  | -0.01186041 |
| C | -0.01238651 | 2.39880108  | -0.03499617 |
| C | -0.74612450 | 1.19642293  | -0.02269103 |
| H | -0.53075884 | -0.94852922 | 0.01588908  |
| H | 1.92210807  | -0.94299911 | 0.01036707  |
| H | 1.91081119  | 3.35656944  | -0.00954050 |
| H | -0.55345182 | 3.34154368  | -0.05852982 |
| C | 6.38213996  | 3.35559792  | 0.15612582  |
| C | 7.77667286  | 3.22045476  | 0.11733026  |
| C | 5.86462850  | 4.65170065  | 0.28077498  |
| C | 8.61511299  | 4.31724669  | 0.19558093  |
| H | 8.22004781  | 2.23292193  | 0.02586205  |
| C | 6.69238090  | 5.75789167  | 0.35978225  |
| H | 4.78926751  | 4.79124756  | 0.32263629  |
| C | 8.09554980  | 5.62456121  | 0.31000441  |
| H | 9.68594575  | 4.15464549  | 0.16828789  |
| H | 6.23962572  | 6.73677841  | 0.46359965  |
| N | 8.92459927  | 6.72309082  | 0.36522926  |
| C | 10.35039913 | 6.53374968  | 0.47711310  |
| H | 10.84179743 | 7.50756416  | 0.48630157  |
| H | 10.63853422 | 5.99633138  | 1.39350375  |
| H | 10.74475781 | 5.97541663  | -0.38042613 |
| C | 8.36611998  | 8.02190155  | 0.65313195  |
| H | 9.16392544  | 8.76563567  | 0.63994903  |
| H | 7.63129610  | 8.31495676  | -0.10622235 |

|   |             |             |             |
|---|-------------|-------------|-------------|
| H | 7.87382673  | 8.06502351  | 1.63657497  |
| B | -2.30997235 | 1.18455477  | -0.02525059 |
| C | -3.05969180 | -0.13272867 | 0.43126412  |
| C | -3.93249792 | -0.80709963 | -0.46156187 |
| C | -2.85744131 | -0.70025283 | 1.70874145  |
| C | -4.54317193 | -1.99771522 | -0.08052062 |
| C | -3.50240657 | -1.89070132 | 2.06089438  |
| C | -4.34438734 | -2.56002891 | 1.18246342  |
| H | -5.19485303 | -2.50401055 | -0.79091600 |
| H | -3.33766637 | -2.30139330 | 3.05605450  |
| C | -3.08939113 | 2.48582482  | -0.47689919 |
| C | -3.98277683 | 3.12922803  | 0.41914922  |
| C | -2.89891183 | 3.07002734  | -1.74900275 |
| C | -4.62255320 | 4.30720937  | 0.04663665  |
| C | -3.57272329 | 4.24721803  | -2.09189476 |
| C | -4.43400133 | 4.88666796  | -1.20992302 |
| H | -5.28964559 | 4.79033108  | 0.75880240  |
| H | -3.41519379 | 4.67102489  | -3.08262143 |
| C | -2.02072365 | -0.03795029 | 2.77458504  |
| H | -2.66388864 | 0.38957901  | 3.55354136  |
| H | -1.36427021 | -0.76407128 | 3.26526927  |
| H | -1.39425669 | 0.76471892  | 2.38362965  |
| C | -4.19288488 | -0.28471705 | -1.85053516 |
| H | -4.90494570 | -0.92416397 | -2.37935020 |
| H | -4.59742974 | 0.73150734  | -1.82824182 |
| H | -3.27500396 | -0.25187050 | -2.44827944 |
| C | -5.02337006 | -3.84377053 | 1.56814165  |
| H | -6.11341935 | -3.75029058 | 1.50832357  |
| H | -4.73507498 | -4.66235886 | 0.89924261  |
| H | -4.76781232 | -4.13958634 | 2.58899953  |
| C | -2.04758755 | 2.43452262  | -2.81938915 |
| H | -1.35366988 | 1.69237509  | -2.42250883 |
| H | -2.68021778 | 1.93456363  | -3.56324859 |
| H | -1.46199598 | 3.18958550  | -3.35354054 |
| C | -4.23822500 | 2.58804963  | 1.80184774  |
| H | -4.63631743 | 1.56962653  | 1.76704110  |
| H | -3.32028272 | 2.55360640  | 2.39908907  |
| H | -4.95443009 | 3.21616788  | 2.33853886  |
| C | -5.14053358 | 6.15896673  | -1.58354924 |
| H | -6.22646171 | 6.05465916  | -1.48341192 |
| H | -4.83704991 | 6.98720600  | -0.93322533 |
| H | -4.92452323 | 6.44823854  | -2.61541939 |
| C | 3.54339681  | 1.20941658  | 0.01278401  |
| C | 4.48644375  | 0.21407015  | -0.03425889 |
| C | 5.75221439  | 0.84505201  | 0.00905235  |
| H | 4.29372790  | -0.84723975 | -0.09641128 |
| C | 5.51662167  | 2.19660262  | 0.08035152  |
| H | 6.71830051  | 0.36222683  | -0.00686287 |
| O | 4.17645231  | 2.41533186  | 0.08124777  |

5

|   |             |             |             |
|---|-------------|-------------|-------------|
| C | 0.00000000  | 0.00000000  | 0.00000000  |
| C | 1.38318390  | 0.00000000  | 0.00000000  |
| C | 2.10427351  | 1.20795101  | 0.00000000  |
| C | 1.37148330  | 2.40873405  | -0.00341767 |
| C | -0.01325998 | 2.39677966  | -0.01056649 |
| C | -0.74860859 | 1.19544297  | -0.00702019 |
| H | -0.53093485 | -0.94869982 | 0.01080371  |
| H | 1.92521501  | -0.94091096 | 0.02238754  |
| H | 1.89248215  | 3.36243870  | -0.04080593 |
| H | -0.55230267 | 3.34081572  | -0.02933854 |
| C | 6.66058126  | 3.01184488  | 0.59438367  |
| C | 7.93272630  | 2.61683970  | 1.02920396  |
| C | 6.42348716  | 4.38910378  | 0.49482371  |
| C | 8.91716590  | 3.53821602  | 1.34091624  |
| H | 8.14641458  | 1.55830478  | 1.14770994  |
| C | 7.39424062  | 5.32469527  | 0.81463916  |

|   |             |             |             |
|---|-------------|-------------|-------------|
| H | 5.46361791  | 4.74687179  | 0.12946082  |
| C | 8.67817637  | 4.92465200  | 1.23681831  |
| H | 9.87806010  | 3.17313796  | 1.68380934  |
| H | 7.15237080  | 6.37656015  | 0.71801865  |
| N | 9.66031441  | 5.84823463  | 1.52786039  |
| C | 10.89862084 | 5.40414359  | 2.11962205  |
| H | 11.55802605 | 6.26231383  | 2.25682125  |
| H | 10.75649765 | 4.92144412  | 3.09889457  |
| H | 11.41779388 | 4.69421998  | 1.46488673  |
| C | 9.31859697  | 7.24802140  | 1.59431882  |
| H | 10.21371944 | 7.82478755  | 1.83116598  |
| H | 8.94131895  | 7.61087202  | 0.63060527  |
| H | 8.55825702  | 7.46616253  | 2.36004760  |
| B | -2.31047955 | 1.18800619  | -0.02376032 |
| C | -3.07738880 | -0.14187998 | 0.36370313  |
| C | -3.93848107 | -0.76626505 | -0.57632095 |
| C | -2.90886306 | -0.76804793 | 1.61829550  |
| C | -4.57297554 | -1.96327033 | -0.26012155 |
| C | -3.57615750 | -1.96420946 | 1.90430637  |
| C | -4.40887053 | -2.58247575 | 0.98090852  |
| H | -5.21535140 | -2.42986024 | -1.00529919 |
| H | -3.43631812 | -2.42084297 | 2.88304803  |
| C | -3.08019981 | 2.50992098  | -0.43472992 |
| C | -3.97357825 | 3.12779304  | 0.47878155  |
| C | -2.88351524 | 3.13426981  | -1.68641116 |
| C | -4.61096658 | 4.31759921  | 0.14169979  |
| C | -3.55498503 | 4.32264688  | -1.99437981 |
| C | -4.41955313 | 4.93459306  | -1.09651151 |
| H | -5.27842148 | 4.77993893  | 0.86720096  |
| H | -3.39306136 | 4.77756057  | -2.97055860 |
| C | -2.08604336 | -0.16481719 | 2.72915149  |
| H | -2.73915999 | 0.27213293  | 3.49460262  |
| H | -1.47916937 | -0.92884665 | 3.22581830  |
| H | -1.41337354 | 0.61989125  | 2.38029039  |
| C | -4.16076751 | -0.18343896 | -1.94753744 |
| H | -4.85942078 | -0.79701905 | -2.52289539 |
| H | -4.56405117 | 0.83199611  | -1.89278525 |
| H | -3.22730754 | -0.12756320 | -2.51860702 |
| C | -5.11305498 | -3.87177579 | 1.29651376  |
| H | -6.20034932 | -3.75929198 | 1.22101283  |
| H | -4.82388255 | -4.66423195 | 0.59721457  |
| H | -4.88131150 | -4.21667793 | 2.30771020  |
| C | -2.02280611 | 2.53830153  | -2.77255535 |
| H | -1.37086958 | 1.74333408  | -2.40861150 |
| H | -2.64948751 | 2.11816338  | -3.56873573 |
| H | -1.39011081 | 3.30328034  | -3.23459607 |
| C | -4.22902350 | 2.54528791  | 1.84443767  |
| H | -4.62950401 | 1.52914053  | 1.77959347  |
| H | -3.30996668 | 2.49079802  | 2.43856078  |
| H | -4.94304029 | 3.15814466  | 2.40137431  |
| C | -5.13365632 | 6.21168788  | -1.43847326 |
| H | -6.21932569 | 6.06427178  | -1.46466342 |
| H | -4.93440318 | 6.99098836  | -0.69478152 |
| H | -4.82519146 | 6.59271615  | -2.41561838 |
| C | 3.55366576  | 1.19805496  | 0.00055994  |
| C | 4.45601820  | 0.19665983  | -0.33280231 |
| C | 5.75628272  | 0.71087994  | -0.17059550 |
| H | 4.19373850  | -0.78411950 | -0.70424507 |
| C | 5.64273320  | 2.02457884  | 0.26523171  |
| H | 6.68497651  | 0.20431276  | -0.39282606 |
| N | 4.30354270  | 2.30085304  | 0.34048694  |
| H | 3.92960192  | 3.11863393  | 0.79222667  |

6

|   |            |            |            |
|---|------------|------------|------------|
| C | 0.00000000 | 0.00000000 | 0.00000000 |
| C | 1.38714047 | 0.00000000 | 0.00000000 |
| C | 2.10407027 | 1.20706983 | 0.00000000 |

|   |             |             |             |
|---|-------------|-------------|-------------|
| C | 1.37730029  | 2.40709169  | -0.01797159 |
| C | -0.00944010 | 2.39779926  | -0.04371656 |
| C | -0.74205884 | 1.19593058  | -0.02862488 |
| H | -0.53276620 | -0.94734111 | 0.02979543  |
| H | 1.92981388  | -0.94005148 | 0.04085624  |
| H | 1.91718313  | 3.34994607  | -0.03890438 |
| H | -0.54914572 | 3.34096183  | -0.07880680 |
| C | 7.92307326  | 1.24798768  | 0.55469696  |
| C | 8.65739277  | 0.06210493  | 0.68656390  |
| C | 8.63294502  | 2.44820884  | 0.68178363  |
| C | 10.02254642 | 0.06807335  | 0.92575571  |
| H | 8.14014558  | -0.89205533 | 0.63792145  |
| C | 9.99833698  | 2.47327422  | 0.91666044  |
| H | 8.10076472  | 3.38976170  | 0.57480670  |
| C | 10.73731872 | 1.27845712  | 1.03345473  |
| H | 10.53215584 | -0.88106393 | 1.04342884  |
| H | 10.49343486 | 3.43366655  | 0.99997556  |
| N | 12.10183211 | 1.29315711  | 1.23780688  |
| C | 12.78552352 | 0.05884747  | 1.53811760  |
| H | 13.85372749 | 0.25653994  | 1.63882232  |
| H | 12.43439407 | -0.41111346 | 2.46997711  |
| H | 12.66265835 | -0.66729681 | 0.72613457  |
| C | 12.75645201 | 2.54043015  | 1.55016490  |
| H | 13.82642060 | 2.36334102  | 1.66874685  |
| H | 12.63319299 | 3.26593732  | 0.73751647  |
| H | 12.38047703 | 3.00141141  | 2.47660509  |
| B | -2.30941391 | 1.19194660  | -0.03211208 |
| C | -3.07014737 | -0.10787965 | 0.45023950  |
| C | -3.95812047 | -0.78314851 | -0.42731014 |
| C | -2.86545286 | -0.66000887 | 1.73433309  |
| C | -4.58112938 | -1.96024884 | -0.02472778 |
| C | -3.52313655 | -1.83697457 | 2.10742576  |
| C | -4.38090719 | -2.50680841 | 1.24478601  |
| H | -5.24344698 | -2.46928130 | -0.72312521 |
| H | -3.35556376 | -2.23672351 | 3.10648376  |
| C | -3.07399870 | 2.49085058  | -0.51102366 |
| C | -3.95872546 | 3.16325670  | 0.37179195  |
| C | -2.87588801 | 3.04545310  | -1.79476245 |
| C | -4.58268039 | 4.34162583  | -0.02533122 |
| C | -3.53459228 | 4.22343299  | -2.16270856 |
| C | -4.38665856 | 4.89242704  | -1.29372710 |
| H | -5.24362140 | 4.84836005  | 0.67602448  |
| H | -3.37189467 | 4.62409275  | -3.16217284 |
| C | -2.01371170 | 0.00620203  | 2.78568687  |
| H | -2.64716292 | 0.46819867  | 3.55286234  |
| H | -1.37731468 | -0.72488832 | 3.29483123  |
| H | -1.36592293 | 0.78332639  | 2.37820612  |
| C | -4.22100294 | -0.28009006 | -1.82307899 |
| H | -4.93991377 | -0.92285359 | -2.33828934 |
| H | -4.61864259 | 0.73902945  | -1.81559829 |
| H | -3.30605289 | -0.26377280 | -2.42591714 |
| C | -5.08019655 | -3.77136363 | 1.65644043  |
| H | -6.16573334 | -3.62713143 | 1.70173443  |
| H | -4.89413359 | -4.57983563 | 0.94126876  |
| H | -4.74736597 | -4.10960187 | 2.64121246  |
| C | -2.03026441 | 2.37773419  | -2.84997523 |
| H | -1.37933974 | 1.60295778  | -2.44266023 |
| H | -2.66789574 | 1.91105955  | -3.61079226 |
| H | -1.39861083 | 3.10777313  | -3.36645749 |
| C | -4.22075530 | 2.65316592  | 1.76517582  |
| H | -4.63832886 | 1.64201287  | 1.75139857  |
| H | -3.30211642 | 2.61287486  | 2.36099341  |
| H | -4.92340533 | 3.30512645  | 2.29115780  |
| C | -5.07248622 | 6.16865390  | -1.69147482 |
| H | -6.15504031 | 6.10320766  | -1.53822493 |
| H | -4.71459537 | 7.01379524  | -1.09232107 |
| H | -4.89502736 | 6.40756251  | -2.74339235 |



|   |            |             |             |
|---|------------|-------------|-------------|
| C | 5.64317212 | 2.08325320  | 1.06535073  |
| C | 6.46359493 | 1.24601108  | 0.34782378  |
| C | 4.23121043 | 2.07609296  | 0.92175893  |
| H | 6.08529470 | 2.73820152  | 1.81092448  |
| C | 5.83398363 | 0.37894112  | -0.61359900 |
| C | 3.57777935 | 1.22581446  | 0.06268548  |
| H | 3.64264533 | 2.72803607  | 1.56151782  |
| C | 4.39027618 | 0.36369048  | -0.75440584 |
| C | 6.44868991 | -0.45912309 | -1.52801625 |
| C | 3.98169785 | -0.48750403 | -1.76677667 |
| H | 7.50656205 | -0.61850024 | -1.67652221 |
| H | 2.97660347 | -0.67681434 | -2.11412653 |
| S | 5.30939130 | -1.24036971 | -2.52211816 |

7

|   |             |             |             |
|---|-------------|-------------|-------------|
| C | 0.00000000  | 0.00000000  | 0.00000000  |
| C | 1.38695198  | 0.00000000  | 0.00000000  |
| C | 2.09912828  | 1.20939644  | 0.00000000  |
| C | 1.36822109  | 2.40811887  | -0.03132959 |
| C | -0.01741437 | 2.39667412  | -0.05855096 |
| C | -0.74608943 | 1.19277875  | -0.03367319 |
| H | -0.52971451 | -0.94898002 | 0.02500980  |
| H | 1.92995710  | -0.93803904 | 0.00861953  |
| H | 1.89979552  | 3.35497348  | -0.07041687 |
| H | -0.55818267 | 3.33856509  | -0.10603094 |
| C | 7.96486424  | 1.54131752  | 0.33903697  |
| C | 8.82396214  | 0.43249070  | 0.35570122  |
| C | 8.56204499  | 2.80489609  | 0.45959131  |
| C | 10.19313915 | 0.57360869  | 0.50003365  |
| H | 8.40859778  | -0.56404061 | 0.26136219  |
| C | 9.92932753  | 2.96385888  | 0.59819995  |
| H | 7.94117982  | 3.69551469  | 0.41439054  |
| C | 10.78968305 | 1.84600807  | 0.61994263  |
| H | 10.80431139 | -0.32088353 | 0.52373153  |
| H | 10.33113462 | 3.96726454  | 0.67561268  |
| N | 12.15171419 | 1.99251290  | 0.74185462  |
| C | 12.98812253 | 0.82455918  | 0.87402558  |
| H | 14.03222077 | 1.13518986  | 0.92920416  |
| H | 12.75790825 | 0.23901085  | 1.77666289  |
| H | 12.88642056 | 0.16176016  | 0.00607055  |
| C | 12.70991708 | 3.29637001  | 1.00481082  |
| H | 13.79586924 | 3.21627498  | 1.06700884  |
| H | 12.47739395 | 4.00184053  | 0.19733104  |
| H | 12.34554878 | 3.72919357  | 1.94835161  |
| B | -2.31406641 | 1.18224740  | -0.04988427 |
| C | -3.07159213 | -0.11637695 | 0.43925112  |
| C | -3.94851439 | -0.80511552 | -0.43871608 |
| C | -2.87227909 | -0.65586534 | 1.72961871  |
| C | -4.56360024 | -1.98485655 | -0.03099207 |
| C | -3.52200982 | -1.83533650 | 2.10764479  |
| C | -4.36524639 | -2.52117909 | 1.24286790  |
| H | -5.21931426 | -2.50362839 | -0.72842299 |
| H | -3.36054233 | -2.22394736 | 3.11208003  |
| C | -3.07720837 | 2.47252818  | -0.55256125 |
| C | -3.97135760 | 3.15519338  | 0.31247291  |
| C | -2.86219350 | 3.01326852  | -1.83968572 |
| C | -4.58818343 | 4.33089690  | -0.10407647 |
| C | -3.51323616 | 4.18918212  | -2.22689278 |
| C | -4.37604868 | 4.86760561  | -1.37568374 |
| H | -5.25480777 | 4.84708738  | 0.58487206  |
| H | -3.33616929 | 4.58124383  | -3.22737279 |
| C | -2.03797456 | 0.03033721  | 2.78200106  |
| H | -2.68379294 | 0.50383088  | 3.53170882  |
| H | -1.40694464 | -0.68983778 | 3.31283340  |
| H | -1.38693923 | 0.80290218  | 2.37066883  |
| C | -4.21046663 | -0.31304975 | -1.83858678 |
| H | -4.92239024 | -0.96503070 | -2.35191322 |

|   |             |             |             |
|---|-------------|-------------|-------------|
| H | -4.61650792 | 0.70278601  | -1.83895297 |
| H | -3.29366820 | -0.29342937 | -2.43853371 |
| C | -5.03504049 | -3.80288898 | 1.65037149  |
| H | -6.10519557 | -3.78439909 | 1.41910554  |
| H | -4.60626426 | -4.65956618 | 1.11732718  |
| H | -4.92347339 | -3.98955709 | 2.72171832  |
| C | -2.00493306 | 2.33329575  | -2.87735886 |
| H | -1.35917338 | 1.56184783  | -2.45569074 |
| H | -2.63455012 | 1.85957109  | -3.64045122 |
| H | -1.36641401 | 3.05687210  | -3.39446977 |
| C | -4.24812634 | 2.66113516  | 1.70875520  |
| H | -4.64795321 | 1.64285145  | 1.70275633  |
| H | -3.33887851 | 2.64531790  | 2.32019208  |
| H | -4.97031008 | 3.30841029  | 2.21364929  |
| C | -5.07189501 | 6.12850810  | -1.80420886 |
| H | -6.14993461 | 5.96624764  | -1.91905507 |
| H | -4.94492435 | 6.92506681  | -1.06352044 |
| H | -4.68704646 | 6.49205616  | -2.76065916 |
| C | 5.64979053  | 2.31077857  | 0.84540710  |
| C | 6.50557911  | 1.41344001  | 0.23843141  |
| C | 4.23978322  | 2.23407565  | 0.75532703  |
| H | 6.07342961  | 3.10182304  | 1.45651819  |
| C | 5.85648035  | 0.36448932  | -0.49735828 |
| C | 3.57024776  | 1.24766453  | 0.06267890  |
| H | 3.65809008  | 2.97408199  | 1.29749393  |
| C | 4.40926763  | 0.27999117  | -0.58027752 |
| S | 5.31454575  | -1.51552571 | -1.85748475 |
| N | 3.98658192  | -0.74465324 | -1.32465321 |
| N | 6.47473806  | -0.59858674 | -1.18450870 |

8

|   |             |             |             |
|---|-------------|-------------|-------------|
| C | 0.00000000  | 0.00000000  | 0.00000000  |
| C | 1.38675467  | 0.00000000  | 0.00000000  |
| C | 2.09876186  | 1.20879533  | 0.00000000  |
| C | 1.36936788  | 2.40762015  | -0.02631692 |
| C | -0.01690286 | 2.39710756  | -0.05439555 |
| C | -0.74567638 | 1.19357584  | -0.03199188 |
| H | -0.53024360 | -0.94873900 | 0.02401021  |
| H | 1.93183294  | -0.93682541 | 0.00501547  |
| H | 1.90231446  | 3.35402315  | -0.05803597 |
| H | -0.55729090 | 3.33944412  | -0.09774441 |
| C | 7.92229290  | 1.51279399  | 0.35323828  |
| C | 8.74733889  | 0.39680834  | 0.53847364  |
| C | 8.54801859  | 2.76465966  | 0.30795386  |
| C | 10.12227574 | 0.51638797  | 0.66312660  |
| H | 8.30331445  | -0.59106669 | 0.62498004  |
| C | 9.92082331  | 2.90286373  | 0.42698758  |
| H | 7.94342732  | 3.65455064  | 0.15389027  |
| C | 10.75208097 | 1.77610982  | 0.59709894  |
| H | 10.70741765 | -0.38082526 | 0.82659719  |
| H | 10.34897312 | 3.89707576  | 0.37646118  |
| N | 12.12036741 | 1.90154272  | 0.69044412  |
| C | 12.92098027 | 0.74548493  | 1.01246919  |
| H | 13.97481237 | 1.02725727  | 1.00983052  |
| H | 12.68218155 | 0.32272704  | 2.00030030  |
| H | 12.79083641 | -0.04616130 | 0.26503678  |
| C | 12.70874376 | 3.21437553  | 0.79728586  |
| H | 13.79360323 | 3.11721394  | 0.85582561  |
| H | 12.48110246 | 3.82537505  | -0.08459633 |
| H | 12.36631161 | 3.76288938  | 1.68785150  |
| B | -2.31287127 | 1.18361493  | -0.04583006 |
| C | -3.07094228 | -0.11628459 | 0.44081490  |
| C | -3.94690734 | -0.80371456 | -0.43890978 |
| C | -2.87321529 | -0.65768624 | 1.73063195  |
| C | -4.56369290 | -1.98328259 | -0.03319516 |
| C | -3.52451421 | -1.83700095 | 2.10669888  |
| C | -4.36759247 | -2.52101674 | 1.24038803  |

|   |             |             |             |
|---|-------------|-------------|-------------|
| H | -5.21892998 | -2.50093179 | -0.73193478 |
| H | -3.36388023 | -2.22705695 | 3.11073101  |
| C | -3.07834249 | 2.47519877  | -0.54332099 |
| C | -3.97067304 | 3.15465792  | 0.32602195  |
| C | -2.86777812 | 3.01999799  | -1.82957823 |
| C | -4.59082259 | 4.33032443  | -0.08573364 |
| C | -3.52196560 | 4.19584575  | -2.21182388 |
| C | -4.38364380 | 4.87056285  | -1.35660528 |
| H | -5.25594862 | 4.84393092  | 0.60661746  |
| H | -3.34753535 | 4.59099461  | -3.21155346 |
| C | -2.03772229 | 0.02553912  | 2.78405143  |
| H | -2.68260427 | 0.49991106  | 3.53402120  |
| H | -1.40866862 | -0.69681460 | 3.31427903  |
| H | -1.38452848 | 0.79641575  | 2.37308995  |
| C | -4.20562508 | -0.31029006 | -1.83886322 |
| H | -4.91726506 | -0.96102360 | -2.35420807 |
| H | -4.61024382 | 0.70611751  | -1.83925609 |
| H | -3.28736901 | -0.29125509 | -2.43656138 |
| C | -5.03919377 | -3.80248012 | 1.64577630  |
| H | -6.10905457 | -3.78277041 | 1.41316111  |
| H | -4.61056991 | -4.65918961 | 1.11262372  |
| H | -4.92935286 | -3.99030076 | 2.71713881  |
| C | -2.01176882 | 2.34483976  | -2.87143821 |
| H | -1.35407453 | 1.58268311  | -2.45144292 |
| H | -2.64238040 | 1.86087358  | -3.62732611 |
| H | -1.38577174 | 3.07334896  | -3.39678820 |
| C | -4.24178727 | 2.65768499  | 1.72239393  |
| H | -4.64207348 | 1.63956402  | 1.71614960  |
| H | -3.32985916 | 2.64028901  | 2.32970498  |
| H | -4.96152173 | 3.30430696  | 2.23164453  |
| C | -5.08310176 | 6.13128369  | -1.77978716 |
| H | -6.16107716 | 5.96711590  | -1.89271108 |
| H | -4.95615765 | 6.92593573  | -1.03703129 |
| H | -4.70131174 | 6.49862075  | -2.73605188 |
| C | 5.61423732  | 2.29598639  | 0.90882085  |
| C | 6.45595501  | 1.40051923  | 0.24585550  |
| C | 4.22453861  | 2.22194120  | 0.81940753  |
| H | 6.06361717  | 3.05373164  | 1.54395952  |
| C | 5.80708779  | 0.41821251  | -0.52023362 |
| C | 3.57312508  | 1.24680453  | 0.06469932  |
| H | 3.62618677  | 2.92656362  | 1.38908748  |
| C | 4.39920985  | 0.32761971  | -0.62115831 |
| N | 3.93719751  | -0.66655329 | -1.46202727 |
| C | 4.92267524  | -1.30858460 | -1.98868366 |
| H | 4.79671750  | -2.13407970 | -2.68133967 |
| S | 6.52715634  | -0.79667258 | -1.54155065 |

**Table S2** The Cartesian coordinates of **1–8** in S1 at the TD-PBE0/6-31G(d,p) level.

|          |             |             |             |
|----------|-------------|-------------|-------------|
| <b>1</b> |             |             |             |
| C        | 0.44794500  | 0.90593700  | -0.38980100 |
| C        | -0.92648600 | 0.82084100  | -0.36446600 |
| C        | -1.57373500 | -0.33720600 | 0.14021300  |
| C        | -0.75099300 | -1.39010700 | 0.60691700  |
| C        | 0.62461200  | -1.29404000 | 0.57561200  |
| C        | 1.28877900  | -0.14131900 | 0.07609000  |
| H        | 0.91845500  | 1.80213700  | -0.78734700 |
| H        | -1.51842400 | 1.65100200  | -0.74118600 |
| H        | -1.22414000 | -2.28858700 | 1.00002200  |
| H        | 1.22844300  | -2.11774200 | 0.94825800  |
| C        | -5.36884600 | 0.23368500  | -0.12436000 |
| C        | -6.23951300 | 1.26931800  | -0.54818900 |
| C        | -5.99031700 | -0.95191000 | 0.35001200  |
| C        | -7.60844800 | 1.14749600  | -0.50535400 |
| H        | -5.80443300 | 2.19298300  | -0.91999600 |
| C        | -7.35757900 | -1.08846800 | 0.39992800  |
| H        | -5.37852800 | -1.78284800 | 0.68496800  |

|   |              |             |             |
|---|--------------|-------------|-------------|
| C | -8.21607000  | -0.04211800 | -0.02616600 |
| H | -8.21945200  | 1.97543700  | -0.84454500 |
| H | -7.77451300  | -2.01652600 | 0.77263600  |
| N | -9.57443600  | -0.17461700 | 0.02197900  |
| C | -10.42945800 | 0.90562000  | -0.41842100 |
| H | -11.47130400 | 0.61248700  | -0.29496600 |
| H | -10.26025400 | 1.81678200  | 0.16887400  |
| H | -10.26509300 | 1.14318800  | -1.47708200 |
| C | -10.17152200 | -1.39907300 | 0.50752000  |
| H | -11.25649000 | -1.31193400 | 0.46415500  |
| H | -9.87391400  | -2.26098500 | -0.10288800 |
| H | -9.88678100  | -1.60007800 | 1.54803100  |
| B | 2.84767500   | -0.02545500 | 0.03114300  |
| C | 3.50858300   | 1.41006200  | -0.02062200 |
| C | 4.48128600   | 1.73142200  | -1.00739900 |
| C | 3.17249500   | 2.42868100  | 0.90931600  |
| C | 5.04261900   | 3.00523500  | -1.06242800 |
| C | 3.76817500   | 3.68889400  | 0.83136500  |
| C | 4.69997100   | 4.00638900  | -0.15285400 |
| H | 5.77300700   | 3.22485100  | -1.84018400 |
| H | 3.50373200   | 4.44246300  | 1.57245600  |
| C | 3.72208400   | -1.34229100 | 0.03606600  |
| C | 4.79194000   | -1.50617200 | 0.95861700  |
| C | 3.49288900   | -2.40120200 | -0.88181100 |
| C | 5.55033800   | -2.67473200 | 0.96505900  |
| C | 4.28483600   | -3.55034400 | -0.85464600 |
| C | 5.31524100   | -3.71624700 | 0.06675800  |
| H | 6.35295900   | -2.77619200 | 1.69462600  |
| H | 4.09710600   | -4.33608200 | -1.58560700 |
| C | 2.20110800   | 2.19178200  | 2.03791000  |
| H | 2.39320400   | 2.88272100  | 2.86504900  |
| H | 1.16227500   | 2.33903100  | 1.71964700  |
| H | 2.26286500   | 1.16933600  | 2.42149500  |
| C | 4.92014700   | 0.72513100  | -2.03942800 |
| H | 5.55755100   | 1.19583200  | -2.79418600 |
| H | 5.47898300   | -0.10121700 | -1.58940600 |
| H | 4.06383500   | 0.27647300  | -2.55373000 |
| C | 5.30649400   | 5.37799600  | -0.24390900 |
| H | 6.37112400   | 5.33028700  | -0.49524900 |
| H | 4.81980400   | 5.97885600  | -1.02261500 |
| H | 5.20536600   | 5.92310300  | 0.69924600  |
| C | 2.42608200   | -2.31870100 | -1.94335300 |
| H | 2.31281600   | -1.30118100 | -2.32897100 |
| H | 2.66108400   | -2.98150700 | -2.78226600 |
| H | 1.44315400   | -2.61127900 | -1.55550800 |
| C | 5.12860500   | -0.44366300 | 1.97254800  |
| H | 5.52015200   | 0.46143400  | 1.49805700  |
| H | 4.24559300   | -0.13742100 | 2.54330900  |
| H | 5.87817700   | -0.80762900 | 2.68189300  |
| C | 6.13609000   | -4.97418400 | 0.10552400  |
| H | 7.18960000   | -4.75960800 | 0.31244500  |
| H | 5.78671800   | -5.65478900 | 0.89233400  |
| H | 6.08079100   | -5.51696100 | -0.84273900 |
| C | -2.99829400  | -0.48236000 | 0.19678800  |
| C | -3.94990100  | 0.42903000  | -0.19462300 |
| H | -3.33975900  | -1.43398000 | 0.60338600  |
| H | -3.62597900  | 1.38743400  | -0.59248000 |

2

|   |             |             |             |
|---|-------------|-------------|-------------|
| C | 1.44838500  | 1.13404700  | -0.39300600 |
| C | 0.06908100  | 1.13571200  | -0.40416900 |
| C | -0.67031300 | -0.00014800 | -0.00021800 |
| C | 0.06911700  | -1.13595300 | 0.40381400  |
| C | 1.44842100  | -1.13418700 | 0.39280300  |
| C | 2.21166900  | -0.00003900 | -0.00004900 |
| H | 1.98070300  | 2.02993400  | -0.70428000 |
| H | -0.45454300 | 2.04391700  | -0.69316400 |

|   |              |             |             |
|---|--------------|-------------|-------------|
| H | -0.45448000  | -2.04419100 | 0.69276300  |
| H | 1.98077500   | -2.03003400 | 0.70413200  |
| C | -6.44252600  | -0.00012500 | -0.00019000 |
| C | -7.18737000  | 1.14259500  | -0.38046400 |
| C | -7.18741600  | -1.14277800 | 0.38019200  |
| C | -8.56174100  | 1.15231200  | -0.38424400 |
| H | -6.66016600  | 2.05232600  | -0.64563700 |
| C | -8.56178700  | -1.15233600 | 0.38426900  |
| H | -6.66025100  | -2.05257900 | 0.64520800  |
| C | -9.29774100  | 0.00004600  | 0.00013900  |
| H | -9.07855500  | 2.06090100  | -0.66813200 |
| H | -9.07864300  | -2.06089900 | 0.66816300  |
| N | -10.65869400 | 0.00016500  | 0.00035700  |
| C | -11.39297000 | 1.17695500  | -0.42011300 |
| H | -12.46039200 | 0.96677000  | -0.38120100 |
| H | -11.18656700 | 2.03046800  | 0.23619300  |
| H | -11.13573000 | 1.45698700  | -1.44768500 |
| C | -11.39307200 | -1.17656500 | 0.42081800  |
| H | -12.46044400 | -0.96593400 | 0.38293800  |
| H | -11.18756100 | -2.02984100 | -0.23608800 |
| H | -11.13508000 | -1.45720000 | 1.44802800  |
| B | 3.76313900   | 0.00002200  | 0.00003100  |
| C | 4.54500100   | 1.38168300  | -0.01272300 |
| C | 5.54881500   | 1.64811400  | -0.98371900 |
| C | 4.29424000   | 2.39692800  | 0.94549100  |
| C | 6.22778200   | 2.86424700  | -0.99315800 |
| C | 5.00528300   | 3.59980600  | 0.91347400  |
| C | 5.97295600   | 3.86149300  | -0.05064200 |
| H | 6.98120400   | 3.04002500  | -1.76040300 |
| H | 4.80066200   | 4.35138600  | 1.67543700  |
| C | 4.54513300   | -1.38155900 | 0.01282100  |
| C | 5.54889700   | -1.64796400 | 0.98388200  |
| C | 4.29445700   | -2.39682400 | -0.94540200 |
| C | 6.22792100   | -2.86406300 | 0.99334900  |
| C | 5.00555800   | -3.59966600 | -0.91335400 |
| C | 5.97319600   | -3.86131300 | 0.05080900  |
| H | 6.98129600   | -3.03981200 | 1.76064500  |
| H | 4.80100800   | -4.35125500 | -1.67532800 |
| C | 3.28599300   | 2.22168300  | 2.05249600  |
| H | 3.53567100   | 2.85721100  | 2.90842600  |
| H | 2.27383600   | 2.48762900  | 1.72514400  |
| H | 3.23120700   | 1.18402700  | 2.39278700  |
| C | 5.89505100   | 0.63976200  | -2.04796400 |
| H | 6.59441300   | 1.06419000  | -2.77505600 |
| H | 6.34917000   | -0.25987800 | -1.62161300 |
| H | 5.00298600   | 0.30932700  | -2.59060300 |
| C | 6.71475300   | 5.16826300  | -0.08519000 |
| H | 7.79627500   | 5.01464700  | -0.16987400 |
| H | 6.41118700   | 5.77928000  | -0.94433400 |
| H | 6.52890900   | 5.75612300  | 0.81852400  |
| C | 3.28624800   | -2.22164700 | -2.05245300 |
| H | 3.23128300   | -1.18396400 | -2.39263100 |
| H | 3.53611000   | -2.85703300 | -2.90843700 |
| H | 2.27412100   | -2.48783100 | -1.72519900 |
| C | 5.89498800   | -0.63963900 | 2.04820000  |
| H | 6.34915400   | 0.26001200  | 1.62192600  |
| H | 5.00285500   | -0.30922900 | 2.59074000  |
| H | 6.59426600   | -1.06408000 | 2.77536700  |
| C | 6.71501800   | -5.16806700 | 0.08541200  |
| H | 7.79650100   | -5.01443400 | 0.17054900  |
| H | 6.41113000   | -5.77924900 | 0.94432500  |
| H | 6.52953900   | -5.75577200 | -0.81847900 |
| C | -2.12768100  | -0.00017800 | -0.00025800 |
| C | -2.87300700  | 0.85664400  | -0.84616000 |
| C | -2.87300900  | -0.85705300 | 0.84558300  |
| C | -4.25173300  | 0.86684500  | -0.83594900 |
| H | -2.34554100  | 1.49789900  | -1.54392500 |

|   |             |             |             |
|---|-------------|-------------|-------------|
| C | -4.25173900 | -0.86724100 | 0.83537400  |
| H | -2.34554700 | -1.49835500 | 1.54330900  |
| C | -4.98709800 | -0.00017700 | -0.00026600 |
| H | -4.77407800 | 1.51852800  | -1.53105600 |
| H | -4.77409000 | -1.51895900 | 1.53044500  |

3

|   |             |             |             |
|---|-------------|-------------|-------------|
| C | -1.56579100 | -1.46388800 | -0.57132100 |
| C | -0.21610400 | -1.72824700 | -0.66153300 |
| C | 0.74311400  | -0.75251400 | -0.29251600 |
| C | 0.25765200  | 0.49787800  | 0.16013200  |
| C | -1.09488200 | 0.75039600  | 0.23866500  |
| C | -2.07176500 | -0.21701400 | -0.11771900 |
| H | -2.27611700 | -2.23216400 | -0.86723900 |
| H | 0.11235100  | -2.69699600 | -1.02727300 |
| H | 0.96175900  | 1.27161500  | 0.46052800  |
| H | -1.43412200 | 1.71871000  | 0.59849600  |
| C | 6.03726600  | -0.51521900 | -0.14540300 |
| C | 7.11431300  | -1.39826100 | -0.41458200 |
| C | 6.38482100  | 0.78675100  | 0.29497600  |
| C | 8.42512300  | -1.01836100 | -0.25629000 |
| H | 6.90595700  | -2.40651300 | -0.75598100 |
| C | 7.69325400  | 1.17849700  | 0.45782900  |
| H | 5.59797200  | 1.50255800  | 0.51400300  |
| C | 8.76167700  | 0.28707400  | 0.18836800  |
| H | 9.20530000  | -1.73679600 | -0.47736900 |
| H | 7.89575900  | 2.18683700  | 0.79815100  |
| N | 10.06226000 | 0.66742200  | 0.34993500  |
| C | 11.13516500 | -0.26130600 | 0.06941500  |
| H | 12.09076200 | 0.22635100  | 0.25836300  |
| H | 11.07511500 | -1.15106100 | 0.70871300  |
| H | 11.12145400 | -0.58804800 | -0.97795500 |
| C | 10.37912900 | 2.00296400  | 0.80664600  |
| H | 11.46086200 | 2.11262700  | 0.87349900  |
| H | 10.00172600 | 2.76510200  | 0.11345000  |
| H | 9.95462900  | 2.19975500  | 1.79908400  |
| B | -3.59878000 | 0.06830100  | -0.01322000 |
| C | -4.60628300 | -1.15144100 | 0.05776700  |
| C | -5.70297200 | -1.24927800 | -0.83950200 |
| C | -4.46233900 | -2.18295300 | 1.02044000  |
| C | -6.57405400 | -2.33526600 | -0.77931500 |
| C | -5.36656400 | -3.24639400 | 1.06199900  |
| C | -6.42579100 | -3.35104100 | 0.16523700  |
| H | -7.39740200 | -2.38875800 | -1.49052600 |
| H | -5.24282300 | -4.01241500 | 1.82675200  |
| C | -4.10686600 | 1.56761800  | 0.02102300  |
| C | -4.97455500 | 2.02510000  | 1.04998400  |
| C | -3.72677000 | 2.50721300  | -0.97015000 |
| C | -5.39905400 | 3.35103700  | 1.08213700  |
| C | -4.18732000 | 3.82529700  | -0.91379300 |
| C | -5.01888900 | 4.27415100  | 0.10654100  |
| H | -6.04878300 | 3.67560900  | 1.89401600  |
| H | -3.89193800 | 4.51971100  | -1.69950100 |
| C | -3.36562800 | -2.16722300 | 2.05547000  |
| H | -3.66901400 | -2.72248900 | 2.94884900  |
| H | -2.44519100 | -2.62719700 | 1.67709100  |
| H | -3.09917300 | -1.15025100 | 2.35522800  |
| C | -5.95069200 | -0.20407000 | -1.89624000 |
| H | -6.76803000 | -0.50619100 | -2.55798400 |
| H | -6.20842200 | 0.76386300  | -1.45582000 |
| H | -5.06269900 | -0.03817000 | -2.51536200 |
| C | -7.36733500 | -4.52175000 | 0.19951300  |
| H | -8.39564300 | -4.21618000 | -0.01884300 |
| H | -7.09107000 | -5.27714400 | -0.54688700 |
| H | -7.35989900 | -5.01226000 | 1.17730600  |
| C | -2.84760500 | 2.13374600  | -2.13741900 |
| H | -2.99874800 | 1.09703500  | -2.44976500 |

|   |             |             |             |
|---|-------------|-------------|-------------|
| H | -3.04653200 | 2.78501800  | -2.99457200 |
| H | -1.78357000 | 2.22888100  | -1.89081500 |
| C | -5.43947700 | 1.10973500  | 2.15295200  |
| H | -6.05084100 | 0.28897800  | 1.76648500  |
| H | -4.59529200 | 0.64992900  | 2.67826100  |
| H | -6.03148600 | 1.65987100  | 2.89044600  |
| C | -5.51010000 | 5.69360200  | 0.15346500  |
| H | -6.59605700 | 5.74619800  | 0.01072900  |
| H | -5.29297800 | 6.16029700  | 1.12088400  |
| H | -5.04354600 | 6.30340800  | -0.62530600 |
| C | 2.14977100  | -1.03702400 | -0.37598600 |
| C | 2.78563600  | -2.22915400 | -0.75776200 |
| S | 3.34531600  | 0.17013900  | 0.02555300  |
| C | 4.17532900  | -2.15906200 | -0.71885500 |
| H | 2.23823400  | -3.11741800 | -1.04494200 |
| C | 4.67628300  | -0.92203800 | -0.30867500 |
| H | 4.81434600  | -2.99530800 | -0.97948500 |

4

|   |             |             |             |
|---|-------------|-------------|-------------|
| C | -1.45157200 | -1.70758300 | -0.65158100 |
| C | -0.15674700 | -2.16476700 | -0.79192000 |
| C | 0.93623300  | -1.32691800 | -0.48151000 |
| C | 0.66939700  | -0.01763300 | -0.03000900 |
| C | -0.63218400 | 0.42461400  | 0.10255600  |
| C | -1.75042700 | -0.39570300 | -0.19944300 |
| H | -2.27860400 | -2.36861400 | -0.89894000 |
| H | 0.02140200  | -3.17698500 | -1.14664600 |
| H | 1.49795900  | 0.63982200  | 0.21660000  |
| H | -0.81651500 | 1.43516900  | 0.45891000  |
| C | 5.68278900  | -0.91572100 | -0.22599200 |
| C | 6.95459600  | -1.50965900 | -0.41133800 |
| C | 5.64904000  | 0.41506700  | 0.25676000  |
| C | 8.11343300  | -0.82717800 | -0.13359400 |
| H | 7.02088800  | -2.52772000 | -0.78175900 |
| C | 6.80413100  | 1.10499600  | 0.53765500  |
| H | 4.68775200  | 0.89340200  | 0.40701200  |
| C | 8.07757300  | 0.50729000  | 0.35312500  |
| H | 9.06285400  | -1.32379900 | -0.29215700 |
| H | 6.72730700  | 2.12053000  | 0.90637500  |
| N | 9.22520000  | 1.18732700  | 0.63224100  |
| C | 10.51386900 | 0.55632500  | 0.44311700  |
| H | 11.30017100 | 1.25407700  | 0.72816100  |
| H | 10.61594100 | -0.34245900 | 1.06358200  |
| H | 10.67384500 | 0.27356900  | -0.60469500 |
| C | 9.16606200  | 2.54773500  | 1.12383600  |
| H | 10.17882700 | 2.91792200  | 1.27761900  |
| H | 8.66608800  | 3.21143400  | 0.40798400  |
| H | 8.63253300  | 2.60653000  | 2.08047800  |
| B | -3.22405200 | 0.11018300  | -0.03818500 |
| C | -4.37793700 | -0.95272000 | 0.15865100  |
| C | -5.54870900 | -0.92275500 | -0.64735700 |
| C | -4.30319200 | -1.96958600 | 1.14746200  |
| C | -6.55143400 | -1.87613800 | -0.48129400 |
| C | -5.33464900 | -2.89860600 | 1.29349600  |
| C | -6.46667000 | -2.88040100 | 0.48319200  |
| H | -7.42867000 | -1.83372000 | -1.12594900 |
| H | -5.25597300 | -3.65361000 | 2.07518200  |
| C | -3.51029900 | 1.66437600  | -0.06794800 |
| C | -4.28065700 | 2.28750900  | 0.95218500  |
| C | -3.02514300 | 2.50126900  | -1.10860100 |
| C | -4.50991000 | 3.66194500  | 0.93156700  |
| C | -3.28736900 | 3.87213700  | -1.10205000 |
| C | -4.01964200 | 4.48048300  | -0.08590700 |
| H | -5.09098900 | 4.10974500  | 1.73699500  |
| H | -2.91827900 | 4.48191400  | -1.92622500 |
| C | -3.14383200 | -2.06668700 | 2.10633300  |
| H | -3.44315000 | -2.58067200 | 3.02549100  |

|   |             |             |             |
|---|-------------|-------------|-------------|
| H | -2.30248600 | -2.62224800 | 1.67558800  |
| H | -2.75460600 | -1.07986100 | 2.37350600  |
| C | -5.73844800 | 0.11871900  | -1.71954900 |
| H | -6.62167000 | -0.10429900 | -2.32604400 |
| H | -5.86007700 | 1.12036800  | -1.29551400 |
| H | -4.87252600 | 0.16929900  | -2.38813100 |
| C | -7.55003400 | -3.91162700 | 0.62836600  |
| H | -8.53976500 | -3.48300700 | 0.44074200  |
| H | -7.41606500 | -4.73556300 | -0.08420800 |
| H | -7.55485400 | -4.34811100 | 1.63171700  |
| C | -2.25385100 | 1.94958400  | -2.28028500 |
| H | -2.62133500 | 0.96340000  | -2.57951000 |
| H | -2.32557000 | 2.62091300  | -3.14203400 |
| H | -1.19038700 | 1.82230200  | -2.04631200 |
| C | -4.85414600 | 1.49821600  | 2.10034500  |
| H | -5.64287400 | 0.81479600  | 1.77037800  |
| H | -4.09125900 | 0.87912500  | 2.58390400  |
| H | -5.27754600 | 2.16582700  | 2.85715500  |
| C | -4.26029400 | 5.96371900  | -0.07446600 |
| H | -5.24589300 | 6.20697300  | 0.33526900  |
| H | -3.51769500 | 6.48511100  | 0.54316500  |
| H | -4.19875600 | 6.38680500  | -1.08172900 |
| C | 2.28382100  | -1.81036100 | -0.62351500 |
| C | 2.81805000  | -3.02924300 | -1.04078900 |
| C | 4.21004500  | -2.90555600 | -0.96779000 |
| H | 2.25375900  | -3.89360000 | -1.35538400 |
| C | 4.48462800  | -1.62449200 | -0.50973400 |
| H | 4.94162800  | -3.66126200 | -1.21709400 |
| O | 3.29866400  | -0.96869900 | -0.30525900 |

5

|   |             |             |             |
|---|-------------|-------------|-------------|
| C | -0.02755400 | 0.04138200  | -0.01623100 |
| C | -0.03672900 | 0.04694900  | 1.36350400  |
| C | 1.17479900  | 0.04476600  | 2.08414300  |
| C | 2.38588800  | 0.03214000  | 1.36273400  |
| C | 2.37602000  | 0.02994100  | -0.01682500 |
| C | 1.17412300  | 0.03761100  | -0.78778400 |
| H | -0.97780300 | 0.01979700  | -0.54472900 |
| H | -0.98421800 | 0.03811400  | 1.89884000  |
| H | 3.33372100  | 0.03209200  | 1.89749300  |
| H | 3.32600900  | 0.04054700  | -0.54608900 |
| C | 1.19564000  | 2.15008800  | 6.52263000  |
| C | 1.20226400  | 1.87063700  | 7.91439800  |
| C | 1.20188500  | 3.51746700  | 6.14585500  |
| C | 1.21562100  | 2.86686000  | 8.85412000  |
| H | 1.19679300  | 0.83939300  | 8.24903900  |
| C | 1.21560200  | 4.52464700  | 7.07556000  |
| H | 1.19673800  | 3.79572800  | 5.09740200  |
| C | 1.22387400  | 4.23599400  | 8.46816700  |
| H | 1.22035700  | 2.59643300  | 9.90239100  |
| H | 1.22039500  | 5.55106300  | 6.73176000  |
| N | 1.23926000  | 5.22726600  | 9.39008300  |
| C | 1.24691200  | 4.91250200  | 10.80678900 |
| H | 1.25915900  | 5.83884900  | 11.37841200 |
| H | 0.35351000  | 4.34705600  | 11.09402200 |
| H | 2.13445400  | 4.33151500  | 11.08091200 |
| C | 1.24924000  | 6.61800000  | 8.97420600  |
| H | 1.26357000  | 7.25449700  | 9.85718300  |
| H | 2.13675000  | 6.84764900  | 8.37447400  |
| H | 0.35594000  | 6.86551400  | 8.39035200  |
| B | 1.17543400  | 0.03869300  | -2.32802500 |
| C | -0.15858100 | 0.40086900  | -3.12069500 |
| C | -0.68717500 | -0.46812600 | -4.11241400 |
| C | -0.86401700 | 1.61115000  | -2.89766100 |
| C | -1.84960700 | -0.14221600 | -4.80887200 |
| C | -2.02448300 | 1.91002300  | -3.61855300 |
| C | -2.54267100 | 1.04573900  | -4.57653100 |



|   |             |             |             |
|---|-------------|-------------|-------------|
| H | -2.22742800 | -0.83896800 | -5.55679700 |
| H | -2.53027700 | 2.85752700  | -3.43230500 |
| C | 2.51221600  | -0.32299300 | -3.11627600 |
| C | 3.05164800  | 0.55283500  | -4.09634400 |
| C | 3.21239200  | -1.53605400 | -2.89526900 |
| C | 4.21828900  | 0.22954000  | -4.78621400 |
| C | 4.37806100  | -1.83221700 | -3.60974900 |
| C | 4.90366500  | -0.96466500 | -4.56007900 |
| H | 4.60685200  | 0.93335900  | -5.52207700 |
| H | 4.88237200  | -2.78018700 | -3.42277400 |
| C | -0.38559500 | 2.64141700  | -1.90669500 |
| H | -0.75705400 | 3.63722500  | -2.17125700 |
| H | -0.72739200 | 2.41587500  | -0.88900700 |
| H | 0.70659300  | 2.67230000  | -1.85749000 |
| C | -0.02225700 | -1.78191100 | -4.42889100 |
| H | -0.61847000 | -2.36174700 | -5.14071100 |
| H | 0.97671300  | -1.64004900 | -4.85243200 |
| H | 0.10869200  | -2.38648000 | -3.52484900 |
| C | -3.80671600 | 1.36764400  | -5.32469200 |
| H | -3.72574500 | 1.10140300  | -6.38404100 |
| H | -4.66565600 | 0.81646200  | -4.92110000 |
| H | -4.04593300 | 2.43380600  | -5.26352600 |
| C | 2.72746900  | -2.56951200 | -1.91097500 |
| H | 1.63539500  | -2.59252200 | -1.85885500 |
| H | 3.08980500  | -3.56642600 | -2.18322500 |
| H | 3.07317700  | -2.35588900 | -0.89221400 |
| C | 2.39531800  | 1.87362000  | -4.40211200 |
| H | 1.39501600  | 1.74167200  | -4.82579500 |
| H | 2.26896600  | 2.47212700  | -3.49312800 |
| H | 2.99462800  | 2.45512700  | -5.11006500 |
| C | 6.14661000  | -1.30511900 | -5.33509200 |
| H | 5.91929200  | -1.52142500 | -6.38629900 |
| H | 6.86475500  | -0.47734300 | -5.32842600 |
| H | 6.64635500  | -2.18529300 | -4.91948900 |
| C | 1.17738500  | 0.09740800  | 3.54815000  |
| C | 1.18136400  | -0.91685100 | 4.53618200  |
| C | 1.18603500  | -0.31064800 | 5.77662600  |
| H | 1.18081500  | -1.97345300 | 4.31608300  |
| C | 1.18582400  | 1.09610700  | 5.57648500  |
| H | 1.19029600  | -0.80311600 | 6.73844200  |
| N | 1.17937100  | 1.27809600  | 4.20975400  |
| H | 1.17791400  | 2.15436400  | 3.71230600  |

6

|   |              |             |             |
|---|--------------|-------------|-------------|
| C | 1.77116200   | -1.01876300 | 0.17427600  |
| C | 0.39341300   | -0.97317100 | 0.25142600  |
| C | -0.31151200  | 0.23673300  | 0.04401600  |
| C | 0.45696600   | 1.38672400  | -0.25776200 |
| C | 1.83470100   | 1.33275300  | -0.30255800 |
| C | 2.55743500   | 0.13029900  | -0.09351200 |
| H | 2.27802500   | -1.97013400 | 0.32008200  |
| H | -0.16352900  | -1.89265300 | 0.40933700  |
| H | -0.04799400  | 2.33768900  | -0.40791100 |
| H | 2.39398000   | 2.24168500  | -0.51268200 |
| C | -6.11181000  | 0.34730600  | -0.22870800 |
| C | -6.87767900  | -0.83171300 | -0.08671200 |
| C | -6.81488400  | 1.50617700  | -0.63000900 |
| C | -8.23781200  | -0.85546700 | -0.30885700 |
| H | -6.37177400  | -1.76105000 | 0.15441800  |
| C | -8.17507200  | 1.50179900  | -0.84881800 |
| H | -6.27523300  | 2.44300100  | -0.72994200 |
| C | -8.93511100  | 0.31727600  | -0.68869800 |
| H | -8.76532600  | -1.79721800 | -0.21360200 |
| H | -8.66106800  | 2.42760200  | -1.13308900 |
| N | -10.28491800 | 0.30478300  | -0.90118000 |
| C | -11.03637700 | -0.91892800 | -0.73540100 |
| H | -12.09336500 | -0.71756800 | -0.90708300 |

|   |              |             |             |
|---|--------------|-------------|-------------|
| H | -10.71772800 | -1.69293500 | -1.44606200 |
| H | -10.92927800 | -1.32029700 | 0.27978600  |
| C | -10.96397000 | 1.50476000  | -1.33611900 |
| H | -12.02506100 | 1.29154500  | -1.46205600 |
| H | -10.86601500 | 2.31276200  | -0.60004600 |
| H | -10.57366800 | 1.86621000  | -2.29616400 |
| B | 4.10750500   | 0.07542200  | -0.16355100 |
| C | 4.82374100   | -1.32448000 | -0.36798600 |
| C | 5.81945100   | -1.78116500 | 0.53569600  |
| C | 4.50219700   | -2.16659600 | -1.46015600 |
| C | 6.42815000   | -3.02033400 | 0.35207500  |
| C | 5.14787900   | -3.39587000 | -1.62172600 |
| C | 6.10881200   | -3.84876300 | -0.72483600 |
| H | 7.17796000   | -3.34912200 | 1.07062600  |
| H | 4.89385300   | -4.01414400 | -2.48194800 |
| C | 4.93726900   | 1.42052600  | -0.02841600 |
| C | 5.88244500   | 1.80234200  | -1.01673100 |
| C | 4.77357100   | 2.28483000  | 1.08169500  |
| C | 6.59290200   | 2.99438100  | -0.89412100 |
| C | 5.51848600   | 3.46331000  | 1.17950100  |
| C | 6.42783800   | 3.84525800  | 0.19915700  |
| H | 7.30187900   | 3.26672800  | -1.67488300 |
| H | 5.38562500   | 4.09774000  | 2.05498200  |
| C | 3.48666200   | -1.78003600 | -2.50679900 |
| H | 3.73392100   | -2.23602700 | -3.47084600 |
| H | 2.47885000   | -2.11383300 | -2.23332700 |
| H | 3.42522200   | -0.69783800 | -2.64355100 |
| C | 6.22707300   | -0.96420600 | 1.73426700  |
| H | 6.97668600   | -1.49395600 | 2.32943900  |
| H | 6.64341400   | 0.00427600  | 1.44241200  |
| H | 5.37278300   | -0.75523600 | 2.38765900  |
| C | 6.79000400   | -5.17611100 | -0.90623700 |
| H | 7.87494700   | -5.05859200 | -1.00842600 |
| H | 6.61994400   | -5.83308200 | -0.04547200 |
| H | 6.42459600   | -5.69309400 | -1.79783700 |
| C | 3.82549200   | 1.97326700  | 2.21320300  |
| H | 3.71375300   | 0.89834600  | 2.37444100  |
| H | 4.17546900   | 2.42725100  | 3.14579600  |
| H | 2.81981600   | 2.36157300  | 2.01429000  |
| C | 6.12998100   | 0.95673000  | -2.23909200 |
| H | 6.50006100   | -0.03821200 | -1.97558700 |
| H | 5.21212800   | 0.80786200  | -2.81853000 |
| H | 6.86309300   | 1.43146400  | -2.89783900 |
| C | 7.20191300   | 5.12913100  | 0.30357000  |
| H | 8.26552800   | 4.97445600  | 0.09291600  |
| H | 6.83810800   | 5.87303200  | -0.41565800 |
| H | 7.11618100   | 5.56729700  | 1.30198700  |
| C | -3.86039600  | 1.19230300  | -0.82131400 |
| C | -4.67559700  | 0.36768900  | -0.02200900 |
| C | -2.47271600  | 1.16396400  | -0.77900600 |
| H | -4.33720400  | 1.81656700  | -1.57189600 |
| C | -4.00241800  | -0.44546600 | 0.94937400  |
| C | -1.76115100  | 0.30474000  | 0.08364800  |
| H | -1.91448200  | 1.76038900  | -1.49265700 |
| C | -2.55220000  | -0.46990300 | 1.00090200  |
| C | -4.55666200  | -1.18756800 | 1.98015900  |
| C | -2.09084000  | -1.21433700 | 2.07402100  |
| H | -5.60180900  | -1.30156600 | 2.22900700  |
| H | -1.06562700  | -1.34297100 | 2.38983700  |
| S | -3.36423500  | -1.89844200 | 2.99110300  |
| 7 |              |             |             |
| C | 1.85492700   | -1.07085400 | 0.17335200  |
| C | 0.47145800   | -1.10287500 | 0.21716500  |
| C | -0.28299500  | 0.06617200  | -0.01986100 |
| C | 0.42860800   | 1.26401400  | -0.25778200 |
| C | 1.80995500   | 1.28862100  | -0.25992800 |

|   |              |             |             |
|---|--------------|-------------|-------------|
| C | 2.57305700   | 0.11884400  | -0.06054100 |
| H | 2.40853100   | -1.99328900 | 0.32988900  |
| H | -0.05183000  | -2.02664400 | 0.42999600  |
| H | -0.11630600  | 2.19283500  | -0.39497500 |
| H | 2.32635200   | 2.23230000  | -0.41724400 |
| C | -6.08997400  | 0.29774200  | -0.21016400 |
| C | -6.96050700  | -0.78597000 | 0.05786400  |
| C | -6.70027100  | 1.52583500  | -0.56186100 |
| C | -8.32781500  | -0.66147200 | -0.04802500 |
| H | -6.52310600  | -1.72615700 | 0.37154600  |
| C | -8.06497600  | 1.66646300  | -0.66663900 |
| H | -6.08279900  | 2.40181000  | -0.72767000 |
| C | -8.92654500  | 0.56736200  | -0.41978900 |
| H | -8.94476900  | -1.52571000 | 0.16761300  |
| H | -8.47300200  | 2.63449900  | -0.93176700 |
| N | -10.28112900 | 0.69308800  | -0.52805900 |
| C | -11.14231400 | -0.44151300 | -0.27181500 |
| H | -12.17883200 | -0.15084900 | -0.43848900 |
| H | -10.90923000 | -1.27678900 | -0.94251200 |
| H | -11.04637700 | -0.79377200 | 0.76268200  |
| C | -10.87270100 | 1.96782600  | -0.87179800 |
| H | -11.95605300 | 1.86218600  | -0.91285700 |
| H | -10.63188000 | 2.73626400  | -0.12686200 |
| H | -10.52691300 | 2.31799100  | -1.85196500 |
| B | 4.13892000   | 0.14491100  | -0.09212400 |
| C | 4.92008600   | -1.21030600 | -0.32163800 |
| C | 5.84521700   | -1.67586900 | 0.64900900  |
| C | 4.69772600   | -2.01674900 | -1.46034100 |
| C | 6.48249200   | -2.90100100 | 0.47831000  |
| C | 5.37034100   | -3.23452100 | -1.60339800 |
| C | 6.26024500   | -3.70107000 | -0.64435000 |
| H | 7.17450600   | -3.24470200 | 1.24547700  |
| H | 5.18886200   | -3.83203900 | -2.49562300 |
| C | 4.88158700   | 1.52797700  | 0.10150800  |
| C | 5.73613200   | 2.02765000  | -0.91553900 |
| C | 4.68630900   | 2.32687000  | 1.25020200  |
| C | 6.33347700   | 3.27686200  | -0.77757000 |
| C | 5.31645100   | 3.57097200  | 1.35823600  |
| C | 6.14009500   | 4.06849200  | 0.35646400  |
| H | 6.96889500   | 3.64704100  | -1.58058900 |
| H | 5.15484200   | 4.16421100  | 2.25714900  |
| C | 3.80966600   | -1.59028300 | -2.60215800 |
| H | 4.41626600   | -1.28701300 | -3.46447100 |
| H | 3.17276300   | -2.41690300 | -2.93336600 |
| H | 3.15959100   | -0.75318200 | -2.34378700 |
| C | 6.13523600   | -0.89167800 | 1.90249100  |
| H | 6.87972000   | -1.40483100 | 2.51725700  |
| H | 6.51297700   | 0.10912100  | 1.67329100  |
| H | 5.23619500   | -0.76379600 | 2.51580000  |
| C | 6.95330300   | -5.02568000 | -0.79398500 |
| H | 8.02708600   | -4.93855500 | -0.59784000 |
| H | 6.55600500   | -5.76132400 | -0.08476900 |
| H | 6.82470900   | -5.43310500 | -1.80029000 |
| C | 3.87338500   | 1.86621300  | 2.43351900  |
| H | 3.23126900   | 1.01529600  | 2.20124100  |
| H | 4.53403500   | 1.56842700  | 3.25701200  |
| H | 3.23625400   | 2.67266700  | 2.81073900  |
| C | 5.98958500   | 1.25265300  | -2.18262100 |
| H | 6.42143800   | 0.26967800  | -1.97281200 |
| H | 5.06444600   | 1.08254900  | -2.74468400 |
| H | 6.67637800   | 1.79462500  | -2.83850300 |
| C | 6.81460500   | 5.40497800  | 0.48562500  |
| H | 7.89888200   | 5.29192700  | 0.60127500  |
| H | 6.65006500   | 6.02211300  | -0.40400900 |
| H | 6.44404600   | 5.95736900  | 1.35322000  |
| C | -3.81945900  | 1.08906300  | -0.82177800 |
| C | -4.63546300  | 0.17086800  | -0.13399100 |

|   |             |             |             |
|---|-------------|-------------|-------------|
| C | -2.43520100 | 1.03608700  | -0.78566600 |
| H | -4.28287300 | 1.84209900  | -1.45094200 |
| C | -3.97747700 | -0.86109100 | 0.59318000  |
| C | -1.74234800 | 0.06006100  | -0.04664400 |
| H | -1.87384000 | 1.74186700  | -1.38686200 |
| C | -2.54073800 | -0.91554500 | 0.64622400  |
| S | -3.37233200 | -2.73503100 | 1.98555400  |
| N | -2.05351500 | -1.90727800 | 1.40499700  |
| N | -4.59314900 | -1.83197700 | 1.30147000  |

8

|   |              |             |             |
|---|--------------|-------------|-------------|
| C | 1.85241600   | -1.06198100 | 0.29462700  |
| C | 0.47600100   | -1.07747900 | 0.36069600  |
| C | -0.28431600  | 0.09359200  | 0.09854100  |
| C | 0.44934400   | 1.27551100  | -0.19800900 |
| C | 1.82482700   | 1.28012000  | -0.23095900 |
| C | 2.59874600   | 0.10929100  | -0.00420200 |
| H | 2.39691300   | -1.98424900 | 0.48500700  |
| H | -0.04046600  | -1.99861100 | 0.60025600  |
| H | -0.07901800  | 2.21153900  | -0.35671400 |
| H | 2.34558300   | 2.21009900  | -0.44791800 |
| C | -6.08897700  | 0.29539700  | -0.21534600 |
| C | -6.92978400  | -0.84212100 | -0.21315000 |
| C | -6.72371900  | 1.54871000  | -0.39388500 |
| C | -8.29480400  | -0.74318500 | -0.36044100 |
| H | -6.48810900  | -1.82970300 | -0.13720200 |
| C | -8.08600800  | 1.66654600  | -0.53936300 |
| H | -6.12209600  | 2.45119400  | -0.37419700 |
| C | -8.92079400  | 0.51905800  | -0.52212900 |
| H | -8.88467400  | -1.65168600 | -0.37443500 |
| H | -8.51660300  | 2.65457700  | -0.64874900 |
| N | -10.27248000 | 0.62603300  | -0.66188600 |
| C | -11.10908900 | -0.55487800 | -0.61386200 |
| H | -12.15434200 | -0.25756400 | -0.68470400 |
| H | -10.88949000 | -1.23723500 | -1.44432800 |
| H | -10.97158000 | -1.09907500 | 0.32737800  |
| C | -10.88634400 | 1.92031500  | -0.87278100 |
| H | -11.96076600 | 1.79240800  | -0.99573400 |
| H | -10.71646600 | 2.58781300  | -0.01926000 |
| H | -10.49401400 | 2.40431600  | -1.77479100 |
| B | 4.14605700   | 0.11307000  | -0.08096200 |
| C | 4.91932900   | -1.25894500 | -0.27141700 |
| C | 5.95719800   | -1.64986800 | 0.61573600  |
| C | 4.61440000   | -2.14038300 | -1.33966800 |
| C | 6.61975800   | -2.86331500 | 0.44284500  |
| C | 5.31188800   | -3.34136400 | -1.49030800 |
| C | 6.31318700   | -3.73033100 | -0.60619700 |
| H | 7.40256100   | -3.14041600 | 1.14786400  |
| H | 5.06883900   | -3.98875200 | -2.33220900 |
| C | 4.92811100   | 1.49054000  | 0.02436800  |
| C | 5.85708300   | 1.88599700  | -0.97501100 |
| C | 4.73402700   | 2.37464800  | 1.11454800  |
| C | 6.51855400   | 3.10829800  | -0.88453700 |
| C | 5.42891300   | 3.58571400  | 1.17966900  |
| C | 6.32155300   | 3.97879400  | 0.18846200  |
| H | 7.21182400   | 3.39138000  | -1.67571700 |
| H | 5.26988800   | 4.23757000  | 2.03791100  |
| C | 3.56049100   | -1.82280900 | -2.37065300 |
| H | 3.78299700   | -2.32493700 | -3.31768000 |
| H | 2.56711200   | -2.15301900 | -2.04517100 |
| H | 3.47866800   | -0.74946500 | -2.55910500 |
| C | 6.35608800   | -0.78989100 | 1.78682300  |
| H | 7.13299800   | -1.27936600 | 2.38169200  |
| H | 6.73363900   | 0.18516100  | 1.46540700  |
| H | 5.50459500   | -0.59435800 | 2.44790000  |
| C | 7.03072700   | -5.04132600 | -0.76277400 |
| H | 8.10127600   | -4.94020400 | -0.55640600 |

|   |             |             |             |
|---|-------------|-------------|-------------|
| H | 6.63966200  | -5.79480700 | -0.06761400 |
| H | 6.91722200  | -5.44049900 | -1.77488000 |
| C | 3.80355500  | 2.04908900  | 2.25571400  |
| H | 3.76827000  | 0.97667300  | 2.46349400  |
| H | 4.11397500  | 2.56838300  | 3.16808300  |
| H | 2.77334800  | 2.35255300  | 2.03599200  |
| C | 6.13698100  | 1.01999700  | -2.17582500 |
| H | 6.58970200  | 0.06591400  | -1.89006000 |
| H | 5.21823600  | 0.77924100  | -2.72134800 |
| H | 6.81440300  | 1.52576700  | -2.87039000 |
| C | 7.06147200  | 5.28448500  | 0.26863800  |
| H | 8.14486800  | 5.12786000  | 0.32995700  |
| H | 6.87870000  | 5.90258100  | -0.61788100 |
| H | 6.75880500  | 5.86178300  | 1.14683200  |
| C | -3.80777900 | 1.14720400  | -0.72016700 |
| C | -4.64590900 | 0.20878100  | -0.06749200 |
| C | -2.43516600 | 1.08969400  | -0.65812600 |
| H | -4.26664500 | 1.89675400  | -1.35828000 |
| C | -3.97055800 | -0.77539500 | 0.68638200  |
| C | -1.72967500 | 0.10792400  | 0.08720000  |
| H | -1.86456400 | 1.79570600  | -1.24961600 |
| C | -2.55911100 | -0.82867600 | 0.79144400  |
| N | -2.08359600 | -1.79212800 | 1.64436600  |
| C | -3.03930600 | -2.47247400 | 2.18178000  |
| H | -2.89264100 | -3.28475700 | 2.88357500  |
| S | -4.65564000 | -1.99406000 | 1.72209100  |

**Table S3** The fluorescence ( $\lambda_{fl}$ ) wavelengths (in nm), the oscillator strength  $f$ , main assignments (coefficient), and main electronic transitions of **5** at the TD-PBE0/6-31+G(d,p)//TD-PBE0/6-31(d,p) level and discussion.

| Electronic transition | $\lambda_{fl}$ | $f$  | Assignment                 |
|-----------------------|----------------|------|----------------------------|
| $S_1 \rightarrow S_0$ | 615            | 0.00 | L $\rightarrow$ H (0.70)   |
| $S_2 \rightarrow S_0$ | 361            | 0.08 | L-2 $\rightarrow$ H (0.70) |
| $S_3 \rightarrow S_0$ | 361            | 0.18 | L-3 $\rightarrow$ H (0.68) |
|                       |                |      | L-1 $\rightarrow$ H (0.12) |

For the DMPB fragments serve as acceptors for the designed compounds, the twist angles between DMPB with CB are the important parameter for molecular  $\pi$ -conjugation. The twist angles between DMPB with CB in  $S_0$  for **1–8** are 1.0°, 35.2°, -18.8°, 3.2°, 17.2°, 44.0°, 34.4°, and 36.9°, while the corresponding values in  $S_1$  are -0.6°, 25.0°, -2.2°, 0.2°, -88.7°, 33.5°, 22.7°, and 22.9°, respectively. It reveals clearly that the twist angles between DMPB with CB in  $S_1$  are smaller than those in  $S_0$  for the designed compounds except for **5**. The conjugative effects of **1–4** and **6–8** in  $S_1$  become higher than those in  $S_0$ , because the twist angles between DMPB with CB decrease. As a consequence, the electron can move more fluently from the donors to the acceptors. Therefore, their  $\lambda_{abs}$  values are larger than those  $\lambda_{fl}$  values for **1–4** and **6–8**. On the contrary, the twist angle between DMPB with CB of **5** in  $S_0$  is larger than that in  $S_1$  (the deviation is 71.5°). It suggests that the conjugative effect between DMPB, CB, and MBA fragments in **5** is weaker than that in  $S_0$ . This worse conjugative effect weakens the ICT character of **5**, resulting in the  $\lambda_{fl}$  value of **5** is smaller than that of  $\lambda_{abs}$  value.

**Table S4** The calculated total energies (in kcal/mol) of the compounds under investigation in different space groups.

| Space groups | <b>1</b>     | <b>2</b>     | <b>3</b>     | <b>4</b>     | <b>5</b>     | <b>6</b>     | <b>7</b>     | <b>8</b>     |
|--------------|--------------|--------------|--------------|--------------|--------------|--------------|--------------|--------------|
| $C_2$        | 173.73016131 | 200.00623688 | 178.25653316 | 185.93494506 | 190.99359068 | 208.63427948 | 206.45774221 | 198.06819033 |
| $C_2/c$      | 177.04881310 | 199.57291521 | 180.68453671 | 187.77089431 | 188.92594770 | 213.52349089 | 211.64571780 | 203.96698905 |
| $C_c$        | 177.04881310 | 196.39055637 | 180.58637673 | 184.53175093 | 190.59844137 | 212.89667199 | 203.71115529 | 203.25751180 |
| $P2_1$       | 176.90848167 | 192.53221631 | 175.79397230 | 180.84396990 | 185.03055869 | 202.08844942 | 209.31644185 | 199.60067521 |

|                                                 |              |              |              |              |              |              |              |              |
|-------------------------------------------------|--------------|--------------|--------------|--------------|--------------|--------------|--------------|--------------|
| <i>P2<sub>1</sub>/c</i>                         | 176.42410707 | 195.55836105 | 178.43460011 | 185.35248615 | 188.84496553 | 210.61724387 | 210.11741969 | 200.43507507 |
| <i>P2<sub>1</sub>2<sub>1</sub>2<sub>1</sub></i> | 177.80224786 | 195.88934875 | 179.46967553 | 184.04741351 | 191.92150542 | 205.88271607 | 206.73557997 | 198.56399752 |
| <i>P<math>\bar{1}</math></i>                    | 176.16306638 | 198.23601554 | 178.91793038 | 187.51077622 | 189.38895563 | 213.74479998 | 207.34022744 | 206.42429608 |
| <i>Pbca</i>                                     | 174.64529770 | 195.77756116 | 181.26127922 | 185.22009682 | 190.40887938 | 208.89126789 | 209.90127566 | 202.79585780 |
| <i>Pbcn</i>                                     | 178.49861691 | 198.79087432 | 182.08143352 | 187.45865951 | 193.16858719 | 209.48374108 | 211.77544258 | 208.77768459 |
| <i>Pna2<sub>1</sub></i>                         | 177.76143847 | 197.12457580 | 182.64566694 | 186.63833462 | 187.47448840 | 205.71774890 | 209.50422385 | 204.97166147 |

**Table S5** The calculated crystal cell parameters of the compounds under investigation with the lowest total energies.

| Species  | Space groups          | a (Å) | b (Å) | c (Å) | $\alpha$ (deg) | $\beta$ (deg) | $\gamma$ (deg) |
|----------|-----------------------|-------|-------|-------|----------------|---------------|----------------|
| <b>1</b> | <i>C2</i>             | 31.12 | 15.13 | 13.45 | 90.00          | 75.83         | 90.00          |
| <b>2</b> | <i>P2<sub>1</sub></i> | 16.21 | 20.26 | 10.51 | 90.00          | 115.49        | 90.00          |
| <b>3</b> | <i>P2<sub>1</sub></i> | 16.65 | 13.21 | 15.76 | 90.00          | 111.25        | 90.00          |
| <b>4</b> | <i>P2<sub>1</sub></i> | 14.40 | 16.92 | 12.91 | 90.00          | 83.69         | 90.00          |
| <b>5</b> | <i>P2<sub>1</sub></i> | 15.10 | 16.45 | 14.42 | 90.00          | 117.89        | 90.00          |
| <b>6</b> | <i>P2<sub>1</sub></i> | 21.98 | 16.66 | 9.17  | 90.00          | 66.64         | 90.00          |
| <b>7</b> | <i>C2</i>             | 41.64 | 12.00 | 29.82 | 90.00          | 147.04        | 90.00          |
| <b>8</b> | <i>C2</i>             | 45.71 | 10.28 | 44.42 | 90.00          | 162.27        | 90.00          |

**Table S6** Center-center distance and the corresponding hole and electron coupling (eV) between the dimer in all of the nearest neighbor pathways for **1–6** in different space groups.

| Species  | space group           | Pathway                | Distance (Å)           | Electron coupling      | Hole coupling          |
|----------|-----------------------|------------------------|------------------------|------------------------|------------------------|
| <b>1</b> | <i>C2</i>             | 1                      | 13.450                 | $-2.25 \times 10^{-4}$ | $7.08 \times 10^{-7}$  |
|          |                       | 2                      | 13.450                 | $-2.25 \times 10^{-4}$ | $7.08 \times 10^{-7}$  |
|          |                       | 3                      | 15.133                 | $-4.71 \times 10^{-5}$ | $-1.36 \times 10^{-5}$ |
|          |                       | 4                      | 15.133                 | $-4.71 \times 10^{-5}$ | $-1.36 \times 10^{-5}$ |
|          |                       | 5                      | 7.401                  | $-9.41 \times 10^{-4}$ | $-1.33 \times 10^{-4}$ |
|          |                       | 6                      | 17.786                 | $2.35 \times 10^{-8}$  | $3.49 \times 10^{-9}$  |
|          |                       | 7                      | 17.786                 | $2.35 \times 10^{-8}$  | $3.49 \times 10^{-9}$  |
|          |                       | 8                      | 11.039                 | $-4.27 \times 10^{-4}$ | $3.75 \times 10^{-4}$  |
|          |                       | 9                      | 11.039                 | $-4.27 \times 10^{-4}$ | $3.75 \times 10^{-4}$  |
| <b>2</b> | <i>P2<sub>1</sub></i> | Pathway                | Distance (Å)           | Electron coupling      | Hole coupling          |
|          |                       | 1                      | 10.512                 | $-3.08 \times 10^{-5}$ | $-3.38 \times 10^{-6}$ |
|          |                       | 2                      | 10.512                 | $-3.08 \times 10^{-5}$ | $-3.38 \times 10^{-6}$ |
|          |                       | 3                      | 15.053                 | $-1.43 \times 10^{-6}$ | $5.40 \times 10^{-7}$  |
|          |                       | 4                      | 15.053                 | $-1.43 \times 10^{-6}$ | $5.40 \times 10^{-7}$  |
|          |                       | 5                      | 10.911                 | $-8.02 \times 10^{-5}$ | $-4.93 \times 10^{-5}$ |
|          |                       | 6                      | 10.911                 | $-3.29 \times 10^{-4}$ | $-4.48 \times 10^{-5}$ |
|          |                       | 7                      | 10.911                 | $-8.02 \times 10^{-5}$ | $-4.93 \times 10^{-5}$ |
| 8        | 10.911                | $-3.29 \times 10^{-4}$ | $-4.48 \times 10^{-5}$ |                        |                        |
| <b>3</b> | <i>P2<sub>1</sub></i> | Pathway                | Distance (Å)           | Electron coupling      | Hole coupling          |
|          |                       | 1                      | 15.762                 | $-2.30 \times 10^{-4}$ | $5.27 \times 10^{-5}$  |
|          |                       | 2                      | 15.762                 | $-2.30 \times 10^{-4}$ | $5.27 \times 10^{-5}$  |
|          |                       | 3                      | 16.648                 | $-7.42 \times 10^{-5}$ | $-9.39 \times 10^{-5}$ |
| 4        | 16.648                | $-7.42 \times 10^{-5}$ | $-9.39 \times 10^{-5}$ |                        |                        |

|          |        |         |              |                   |                         |                        |
|----------|--------|---------|--------------|-------------------|-------------------------|------------------------|
|          |        |         | 5            | 14.215            | $-2.44 \times 10^{-7}$  | $-8.45 \times 10^{-8}$ |
|          |        |         | 6            | 10.487            | $9.03 \times 10^{-4}$   | $1.85 \times 10^{-4}$  |
|          |        |         | 7            | 14.215            | $-2.44 \times 10^{-7}$  | $-8.45 \times 10^{-8}$ |
|          |        |         | 8            | 10.487            | $9.03 \times 10^{-4}$   | $1.85 \times 10^{-4}$  |
| <b>4</b> | $P2_I$ | Pathway | Distance (Å) | Electron coupling | Hole coupling           |                        |
|          |        |         | 1            | 12.906            | $3.26 \times 10^{-14}$  | $2.45 \times 10^{-15}$ |
|          |        |         | 2            | 12.906            | $3.26 \times 10^{-14}$  | $2.45 \times 10^{-15}$ |
|          |        |         | 3            | 14.396            | $3.63 \times 10^{-5}$   | $7.77 \times 10^{-5}$  |
|          |        |         | 4            | 14.396            | $3.63 \times 10^{-5}$   | $7.77 \times 10^{-5}$  |
|          |        |         | 5            | 10.651            | $4.35 \times 10^{-4}$   | $-8.02 \times 10^{-4}$ |
|          |        |         | 6            | 10.651            | $4.35 \times 10^{-4}$   | $-8.02 \times 10^{-4}$ |
|          |        |         | 7            | 18.984            | $2.81 \times 10^{-4}$   | $-3.02 \times 10^{-4}$ |
|          |        |         | 8            | 17.888            | $-6.08 \times 10^{-7}$  | $1.30 \times 10^{-6}$  |
| <b>5</b> | $P2_I$ | Pathway | Distance (Å) | Electron coupling | Hole coupling           |                        |
|          |        |         | 1            | 15.101            | $4.84 \times 10^{-4}$   | $-6.59 \times 10^{-4}$ |
|          |        |         | 2            | 15.101            | $4.84 \times 10^{-4}$   | $-6.59 \times 10^{-4}$ |
|          |        |         | 3            | 14.422            | $1.75 \times 10^{-16}$  | $2.80 \times 10^{-17}$ |
|          |        |         | 4            | 14.422            | $1.75 \times 10^{-16}$  | $2.80 \times 10^{-17}$ |
|          |        |         | 5            | 10.718            | $-2.30 \times 10^{-3}$  | $1.22 \times 10^{-4}$  |
|          |        |         | 6            | 14.449            | $-1.470 \times 10^{-6}$ | $2.24 \times 10^{-8}$  |
|          |        |         | 7            | 10.718            | $-2.30 \times 10^{-3}$  | $1.22 \times 10^{-4}$  |
|          |        |         | 8            | 14.449            | $-1.470 \times 10^{-6}$ | $2.24 \times 10^{-8}$  |
| <b>6</b> | $P2_I$ | Pathway | Distance (Å) | Electron coupling | Hole coupling           |                        |
|          |        |         | 1            | 9.171             | $-4.50 \times 10^{-3}$  | $-4.37 \times 10^{-4}$ |
|          |        |         | 2            | 9.171             | $-4.50 \times 10^{-3}$  | $-4.37 \times 10^{-4}$ |
|          |        |         | 3            | 20.180            | $2.10 \times 10^{-4}$   | $7.02 \times 10^{-6}$  |
|          |        |         | 4            | 20.180            | $2.10 \times 10^{-4}$   | $7.02 \times 10^{-6}$  |
|          |        |         | 5            | 10.987            | $8.99 \times 10^{-4}$   | $-3.58 \times 10^{-4}$ |
|          |        |         | 6            | 10.987            | $8.99 \times 10^{-4}$   | $-3.58 \times 10^{-4}$ |
